1 **Full title: Geochemical and metagenomic characterization of Jinata Onsen, a Proterozoic-analog**  
2 **hot spring, reveals novel microbial diversity including iron-tolerant phototrophs and thermophilic**  
3 **lithotrophs**

4 **Running title: Microbes of Jinata Onsen**

5  
6 Lewis M. Ward<sup>1,2,3\*</sup>, Airi Idei<sup>4</sup>, Mayuko Nakagawa<sup>2,5</sup>, Yuichiro Ueno<sup>2,5,6</sup>, Woodward W.  
7 Fischer<sup>3</sup>, Shawn E. McGlynn<sup>2\*</sup>  
8

9 1. Department of Earth and Planetary Sciences, Harvard University, Cambridge, MA 02138 USA

10 2. Earth-Life Science Institute, Tokyo Institute of Technology, Meguro, Tokyo, 152-8550, Japan

11 3. Division of Geological and Planetary Sciences, California Institute of Technology, Pasadena, CA  
12 91125 USA

13 4. Department of Biological Sciences, Tokyo Metropolitan University, Hachioji, Tokyo 192-0397,  
14 Japan

15 5. Department of Earth and Planetary Sciences, Tokyo Institute of Technology, Meguro, Tokyo,  
16 152-8551, Japan

17 6. Department of Subsurface Geobiological Analysis and Research, Japan Agency for Marine-Earth  
18 Science and Technology, Natsushima-cho, Yokosuka 237-0061, Japan

19 **Correspondence: [lewis\\_ward@fas.harvard.edu](mailto:lewis_ward@fas.harvard.edu) or [mcglynn@elsi.jp](mailto:mcglynn@elsi.jp)**  
20  
21  
22

23 **Keywords:** geomicrobiology, Proterozoic, microaerobic, astrobiology, ferruginous, thermophiles  
24  
25  
26  
27  
28  
29  
30  
31  
32  
33  
34  
35  
36  
37  
38  
39  
40  
41  
42  
43  
44  
45

## 46 **Abstract**

47 Hydrothermal systems, including terrestrial hot springs, contain diverse geochemical  
48 conditions that vary over short spatial scales due to progressive interaction between the reducing  
49 hydrothermal fluids, the oxygenated atmosphere, and in some cases seawater. At Jinata Onsen,  
50 on Shikinejima Island, Japan, an intertidal, anoxic, iron-rich hot spring mixes with the  
51 oxygenated atmosphere and seawater over short spatial scales, creating a diversity of chemical  
52 potentials and redox pairs over a distance ~10 m. We characterized the geochemical conditions  
53 along the outflow of Jinata Onsen as well as the microbial communities present in biofilms,  
54 mats, and mineral crusts along its traverse via 16S rRNA amplicon and genome-resolved shotgun  
55 metagenomic sequencing. The microbial community changed significantly downstream as  
56 temperatures and dissolved iron concentrations decreased and dissolved oxygen increased. Near  
57 the spring source, visible biomass is limited relative to downstream, and primary productivity  
58 may be fueled by oxidation of ferrous iron and molecular hydrogen by members of the  
59 Zetaproteobacteria and Aquificae. Downstream, the microbial community is dominated by  
60 oxygenic Cyanobacteria. Cyanobacteria are abundant and active even at ferrous iron  
61 concentrations of ~150  $\mu\text{M}$ , which challenges the idea that iron toxicity limited cyanobacterial  
62 expansion in Precambrian oceans. Several novel lineages of Bacteria are also present at Jinata  
63 Onsen, including previously uncharacterized members of the Chloroflexi and Caldithrichaeota  
64 phyla, positioning Jinata Onsen as a valuable site for future characterization of these clades.

## 66 **Introduction**

67 A major theme of environmental microbiology has been the enumeration of microbial  
68 groups that are capable of exploiting diverse chemical potentials (i.e. chemical disequilibria) that  
69 occur in nature (e.g. 8, 27, 115). Hot springs, with their varied chemical compositions, provide  
70 reservoirs of novel microbial diversity, where environmental and geochemical conditions select  
71 for lineages and metabolisms distinct from other Earth-surface environments (e.g. 4, 10, 28, 130,  
72 131). In addition to their value as sources of microbial diversity, hot springs also provide  
73 valuable test beds for understanding microbial community processes driven by different suites of  
74 metabolisms (e.g. 52)—this in turn allows these systems to serve as process analogs and to  
75 provide a window into biosphere function during early times in Earth history, for example when  
76 the  $\text{O}_2$  content of surface waters was low or non-existent. In contrast to most surface ecosystems  
77 which are fueled almost entirely by oxygenic photosynthesis by plants, algae, and Cyanobacteria,  
78 hot spring microbial communities are commonly supported by lithotrophic or anoxygenic  
79 phototrophic organisms that derive energy and electrons for carbon fixation by oxidizing  
80 geologically sourced electron donors such as  $\text{Fe}^{2+}$ , sulfide, arsenite, and molecular hydrogen (e.g.  
81 36, 65, 71, 109, 130). These communities may therefore provide insight into the function of  
82 microbial communities on the early Earth or other planets, in which oxygenic photosynthesis  
83 may be absent or less significant and anoxygenic photosynthetic or lithotrophic metabolisms may  
84 play a larger role, resulting in overall lower rates of primary productivity (e.g. 14, 66, 101, 135,  
85 136, 137).

86 Here, we present a geomicrobiological characterization of a novel Precambrian Earth  
87 process analog site: Jinata Onsen, on Shikinejima Island, Tokyo Prefecture, Japan. While a small  
88 number of metagenome-assembled genomes have previously been recovered from Jinata (129,  
89 131), we describe here the first overall characterization of the geochemistry and microbial  
90 community of this site. This site supports sharp gradients in geochemistry that in some ways  
91 recapitulate spatially environmental transitions which occurred temporally during Proterozoic

92 time. The modern, sulfate-rich, well-oxygenated ocean that we see today is a relatively recent  
93 state, typical only of only the last few hundred million years (e.g. 79). For the first half of Earth  
94 history, until ~2.3 billion years ago (Ga), the atmosphere and oceans were anoxic (54), and the  
95 oceans were largely rich in dissolved iron but poor in sulfur (124). Following the Great  
96 Oxygenation Event ~2.3 Ga, the atmosphere and surface ocean accumulated some oxygen, and  
97 the ocean transitioned into a stratified state with oxygenated surface waters and anoxic deeper  
98 waters, rich in either dissolved iron or sulfide (92). At Jinata Onsen, this range of geochemical  
99 conditions is recapitulated over just a few meters, providing an ideal space-for-time analog to  
100 test hypotheses of how microbial diversity and productivity may have varied as environmental  
101 conditions changed through Earth history.

102 At Jinata hot spring, anoxic, iron-rich hydrothermal fluids feed a subaerial spring that  
103 flows into a small bay, and mixes with seawater over the course of a few meters. Over its course  
104 the waters transition from low-oxygen, iron-rich conditions analogous to some aspects of the  
105 early Proterozoic oceans, toward iron-poor and oxygen-rich conditions typical of modern coastal  
106 oceans. In upstream regions of the stream where oxygenic Cyanobacteria are at very low  
107 abundance, biomass is visibly sparse; however, downstream, biomass accumulates in the form of  
108 thick microbial mats containing abundant Cyanobacteria. Visible differences in accumulation  
109 and appearance of biomass across the temperature and redox gradient establish the hypothesis  
110 that microbial community composition, as well as the magnitude and metabolic drivers of  
111 primary productivity, varies along the spring flow. To begin testing this hypothesis and to  
112 provide a baseline description of the geochemistry and microbiology of this site in support of  
113 future investigation, we performed geochemical measurements, 16S rRNA amplicon sequencing,  
114 and genome-resolved metagenomic sequencing to recover draft genomes of diverse novel  
115 microbial lineages that inhabit Jinata Onsen.

## 116 **Materials and Methods:**

### 117 *Geological context and sedimentology of Jinata:*

118 Jinata Onsen is located at 34.318 N, 139.216 E on the island of Shikinejima, Tokyo  
119 Prefecture, Japan. Shikinejima is part of the Izu Islands, a chain of volcanic islands that formed  
120 in the last few million years along the northern edge of the Izu-Bonin-Mariana Arc (58).  
121 Shikinejima is formed of Late Paleopleistocene- to-Holocene non-alkaline felsic volcanics and  
122 Late-Miocene to Pleistocene non-alkaline pyroclastic volcanic flows, with Jinata Onsen located  
123 on a small bay on the southern side of the island (Figure 1).

### 124 *Sample collections:*

125 Five sites were sampled at Jinata Onsen: the Source Pool, Pool 1, Pool 2, Pool 3, and the  
126 Outflow (Figure 1, Figure 2). During the first sampling trip in January 2016, two whole  
127 community DNA samples were collected from each site for 16S rRNA amplicon sequencing.  
128 During the second sampling trip, additional DNA was collected from the Source Pool and Pool 2  
129 for shotgun metagenomic sequencing along with gas samples for qualitative analysis. Samples  
130 for quantitative gas analysis were collected in October 2017 and April 2018.

131 Samples were collected as mineral scrapings of loosely attached, fluffy iron oxide coating  
132 from surfaces and clasts upstream (Source Pool and Pool 1) and as samples of microbial mat  
133 downstream (Pools 2 and 3, and Outflow) using sterile forceps and spatulas (~0.25 cm<sup>3</sup> of  
134 material). Immediately after sampling, cells were lysed and DNA preserved with a Zymo  
135 Terralyzer BashingBead Matrix and Xpedition Lysis Buffer. Lysis was achieved by attaching  
136 tubes to the blade of a cordless reciprocating saw (Black & Decker, Towson, MD) and operating  
137 for 1 minute. Aqueous geochemistry samples consisted of water collected with sterile syringes

138 and filtered through a 0.2  $\mu\text{m}$  filter. Gas samples were collected near sites of ebullition emerging  
139 from the bottom of the Source Pool; collection was done into serum vials by water substitution,  
140 and then sealed underwater to prevent contamination by air.

141 ***Geochemical analysis:***

142 Dissolved oxygen (DO), pH, and temperature measurements were performed *in situ* using  
143 an Extech DO700 8-in-1 Portable Dissolved Oxygen Meter (FLIR Commercial Systems, Inc.,  
144 Nashua, NH). Iron concentrations were measured using the ferrozine assay (114) following  
145 acidification with 40 mM sulfamic acid to inhibit iron oxidation by  $\text{O}_2$  or oxidized nitrogen  
146 species (69). Ammonia/ammonium concentrations were measured using a TetraTest  $\text{NH}_3/\text{NH}_4^+$   
147 Kit (TetraPond, Blacksburg, VA) following manufacturer's instructions but with colorimetry of  
148 samples and  $\text{NH}_4\text{Cl}$  standards quantified with a Thermo Scientific Nanodrop 2000c  
149 spectrophotometer (Thermo Fisher Scientific, Waltham, MA) at 700 nm to improve sensitivity  
150 and accuracy. Anion concentrations were measured via ion chromatography on a Shimadzu Ion  
151 Chromatograph (Shimadzu Corp., Kyoto, JP) equipped with a Shodex SI-90 4E anion column  
152 (Showa Denko, Tokyo, JP).

153 Presence of  $\text{H}_2$  and  $\text{CH}_4$  in gas samples was initially qualitatively determined by  
154 comparison to standards with a Shimadzu GC-14A gas chromatograph within 12 hours of  
155 collection to minimize oxidation of reduced gases. Subsequent gas samples were analyzed  
156 following methods from (116). In brief, samples were analyzed using a gas chromatograph (GC-  
157 4000, GL Sciences) equipped with both a pulsed discharge detector (PDD) and a thermal  
158 conductivity detector (TCD). The GC was equipped with a ShinCarbon ST packed column (2 m  
159  $\times$  2.2 mm ID, 50/80 mesh) connected to a HayeSepo Q packed column (2 m  $\times$  2.2 mm ID, 60/80  
160 mesh) to separate  $\text{O}_2$ ,  $\text{N}_2$ ,  $\text{CO}_2$ , and light hydrocarbons. Temperature was held at 40°C for 6  
161 minutes before ramping up to 200°C at 20°C/min. This temperature was held for 6 minutes  
162 before ramping up to 250°C at 50°C/min before a final hold for 15 minutes. The value of  
163 standard errors (SE) were determined by replicate measurement of samples. The detection  
164 limit was on the order of 1nmol/cc for  $\text{H}_2$  and  $\text{CH}_4$ .

165 Water samples for dissolved inorganic carbon (DIC) and dissolved organic carbon (DOC)  
166 concentration measurements were collected with sterile syringes and transferred after filtering  
167 through a 0.2  $\mu\text{m}$  filter to pre-vacuumed 30 mL serum vials which were sealed with butyl rubber  
168 septa and aluminum crimps.

169 DIC and DOC concentrations in water samples were analyzed by measuring  $\text{CO}_2$  in the  
170 headspace of the sampled vials after the reaction of sample with either phosphoric acid for DIC  
171 or potassium persulfate for DOC with a Shimadzu GC-14A gas chromatograph. Sodium  
172 bicarbonate standards and glucose standards were used for making calibration curves to quantify  
173 DIC and DOC concentrations, respectively.

174 ***16S rRNA and metagenomic sequencing and analysis:***

175 Sequencing and analysis of 16S rRNA amplicon data followed methods from (130).  
176 Following return to the lab, bulk environmental DNA was extracted and purified with a Zymo  
177 Soil/Fecal DNA extraction kit. The V4-V5 region of the 16S rRNA gene was PCR amplified  
178 using archaeal and bacterial primers 515F (GTGCCAGCMGCCGCGGTAA) and 926R  
179 (CCGYCAATTYMTTTRAGTTT) (15). DNA was quantified with a Qubit 3.0 fluorimeter (Life  
180 Technologies, Carlsbad, CA) following the manufacturer's instructions following DNA  
181 extraction and PCR steps. Successful amplification of all samples was verified by viewing on a  
182 gel after initial pre-barcoding PCR (30 cycles). Duplicate PCR reactions were pooled and

183 reconditioned for five cycles with barcoded primers. Samples for sequencing were submitted to  
184 Laragen (Culver City, CA) for analysis on an Illumina MiSeq platform. Sequence data were  
185 processed using QIIME version 1.8.0 (15). Raw sequence pairs were joined and quality-trimmed  
186 using the default parameters in QIIME. Sequences were clustered into *de novo* operational  
187 taxonomic units (OTUs) with 99% similarity using UCLUST open reference clustering protocol  
188 (26). Then, the most abundant sequence was chosen as representative for each *de novo* OTU  
189 (125). Taxonomic identification for each representative sequence was assigned using the Silva-  
190 132 database (94) clustered separately at 99% and at 97% similarity. Singletons and  
191 contaminants (OTUs appearing in the negative control datasets) were removed. 16S rRNA  
192 sequences were aligned using MAFFT (62) and a phylogeny constructed using FastTree (93).  
193 Alpha diversity was estimated using the Shannon Index (100) and Inverse Simpson metric (1/D)  
194 (48, 104). Assessment of sampling depth was estimated using Good's Coverage (37). All  
195 statistics were calculated using scripts in QIIME and are reported at the 99% and 97% OTU  
196 similarity levels. Multidimensional scaling (MDS) analyses and plots to evaluate the similarity  
197 between different samples and environments were produced in R using the vegan and ggplot2  
198 packages (86, 95, 139).

199 Following initial characterization via 16S rRNA sequencing, four samples were selected  
200 for shotgun metagenomic sequencing: JP1-A and JP3-A from the first sampling trip, and JP1L-1  
201 and JP2-1 from the second sampling trip. Purified DNA was submitted to SeqMatic LLC  
202 (Fremont, CA) for library preparation and 2x100bp paired-end sequencing via Illumina HiSeq  
203 4000 technology. Samples JP1-A and JP3-A shared a single lane with two samples from another  
204 project, while JP1L-1 and JP2-1 shared a lane with one sample from another project.

205 Raw sequence reads from all four samples were co-assembled with MegaHit v. 1.02 (77)  
206 and genome bins constructed based on nucleotide composition and differential coverage using  
207 MetaBAT (59), MaxBin (140), and CONCOCT (2) prior to dereplication and refinement with  
208 DAS Tool (103) to produce the final bin set. Genome bins were assessed for completeness,  
209 contamination, and strain-level heterogeneity using CheckM (89), tRNA sequences found with  
210 Aragorn (73), and presence of metabolic pathways of interest predicted with MetaPOAP (134).  
211 Coverage was extracted using bbmap (11) and samtools (76). Genes of interest (e.g. coding for  
212 ribosomal, photosynthesis, iron oxidation, and electron transport proteins) were identified from  
213 assembled metagenomic data locally with BLAST+ (12) and were screened against outlier (e.g.  
214 likely contaminant) contigs as determined by CheckM using tetranucleotide, GC, and coding  
215 density content. Translated protein sequences of genes of interest were aligned with MUSCLE  
216 (25), and alignments manually curated in Jalview (138). Phylogenetic trees were calculated using  
217 RAxML (110) on the Cipres science gateway (83). Node support for phylogenies was calculated  
218 with transfer bootstraps by BOOSTER (74). Trees were visualized with the Interactive Tree of  
219 Life viewer (Letunic and Bork 2016). Because sequencing depth of each sample in the full  
220 metagenome was uneven, relative abundance of genes of interest between metagenomic datasets  
221 was normalized to the coverage of *rpoB* genes in each raw dataset as mapped onto the  
222 coassembly. Like the 16S rRNA gene, *rpoB* is a highly conserved, vertically-inherited gene  
223 useful for taxonomic identification of organisms but has the added advantage that it is only  
224 known to occur as a single copy per genome (17) and is more readily assembled in metagenomic  
225 datasets (e.g. 131). Presence and classification of hydrogenase genes was determined with  
226 HydDB (107). Taxonomic assignment of MAGs was made based on placement in a reference  
227 phylogeny built with concatenated ribosomal protein sequences following Hug et al. (50) and



228 confirmed using GTDB-Tk (90). Optimal growth temperatures of MAGs was predicted based on  
229 proteome-wide 2-mer amino acid composition following methods from (78).

230

## 231 **Results**

### 232 *Site description*

233 The source water of Jinata Onsen emerges with low dissolved oxygen concentrations near  
234 our limit of detection, is iron-rich, and gently bubbles gas from the spring source (Table 1,  
235 Figure 1, Figure 2). Temperatures at the source are ~63°C. Water emerges into the Source Pool,  
236 which has no visible microbial mats or biofilms (Figure 2D). Surfaces are instead coated with a  
237 fluffy red precipitate, likely a poorly ordered or short range-ordered ferric iron oxide phase such  
238 as ferrihydrite. Flow from the source is—at least in part—tidally charged, with the highest water  
239 levels and flow rates occurring at high tide. At low tide, flow rates drop and the water level of  
240 the Source Pool can drop by decimeters and portions of the Source Pool can drain during spring  
241 low tides. Downstream, the spring water collects into a series of pools (Pool 1-3) (Figure 2C,E-  
242 F), which cool sequentially (Figure 3, Supplemental Table 1). Pool 1 contains iron oxides like  
243 the Source Pool, but also develops macroscopic microbial streamers that are coated in iron  
244 oxides and thin veil-like layers of microorganisms overlaying iron oxide sediments—structures  
245 similar to those typically made by marine iron-oxidizing Zetaproteobacteria (e.g. 35). Streamers  
246 are very fine (mm-scale) and delicate (break apart on contact with forceps) but can reach several  
247 centimeters in length. Cyanobacteria in Pool 2 and Pool 3 display high levels of photosynthetic  
248 activity as revealed by high dissolved oxygen concentration (~234 μM), low dissolved inorganic  
249 carbon concentrations, and the accumulation of visible O<sub>2</sub> bubbles on the surface and within the  
250 fabric of the mat. Downstream pools (Pools 2 and 3) mix with seawater during high tide due to  
251 wave action, but this seawater influence does not appear to influence the Source Pool or Pool 1.  
252 Samples were collected and temperatures were measured at high tide, reflecting the lowest  
253 temperatures experienced by microbes in the pools—at low tide, hot spring input is dominant  
254 and temperatures rise (observed range at each site in Supplemental Table 1). Subaqueous  
255 surfaces in Pools 2 and 3 are covered in thick microbial mats. In Pool 2, the mat is coated in a  
256 layer of fluffy iron oxide similar to that in the Source Pool, with dense microbial mat below  
257 (Figure 2E). Pool 3 contains only patchy iron oxides, with mostly exposed microbial mats  
258 displaying a finger-like morphology. These “fingers” were 0.5-1 cm in diameter and up to ~5 cm  
259 long and were closely packed and carpeting surfaces of Pool 3 below the high tide line,  
260 potentially related to turbulent mixing from wave action during high tide (Figure 2F). The  
261 Outflow is the outlet of a channel connecting Pool 2 to the bay. Its hydrology is dominantly  
262 marine with small admixtures of inflowing spring water (Figure 2G).

263 Jinata hot spring was visited twice for observation and community DNA sampling in  
264 2016 (January and September), and again for observation and gas sampling in October 2017 and  
265 April 2018. These visits corresponded to a range of tidal conditions, including a spring low and  
266 high tide in September 2016. General features of the spring were consistent across this period  
267 (including abundance and distribution of iron minerals and microbial mats), differing primarily  
268 in an apparent tidal dependence in flow rate and water level of the spring and the amount of  
269 seawater influence on Pool 3. These differences in flow and mixing led to variation in water  
270 temperatures of 3-10 °C (Supplemental Table 1). At high tide, the flow rate of the spring  
271 increases, as does seawater influx to Pool 3. During the spring low tide, the spring flow stagnated  
272 and the water level of Source Pool and Pool 1 dropped by decimeters, with some portions  
273 draining entirely. During less extreme low tides observed on other dates, the spring flow was low

274 but nonzero and the water level of the Source Pool did not drop significantly. While there is  
275 substantial variability in the flow rate from the spring based on tides (and resulting shifts in water  
276 level and temperature), the overall geochemistry of the source water and the microbial  
277 community appeared largely similar between expeditions.

278

### 279 ***Geochemistry***

280 Geochemical measurements along the flow path of Jinata Onsen revealed a major shift  
281 from hot, low-oxygen, high-iron source water to cooler, more oxygen-rich water with less  
282 dissolved iron downstream. Geochemistry measurements of Jinata source water are summarized  
283 in Table 1, while geochemical gradients along the stream outflow are summarized in Figure 3  
284 and Supplemental Table 1. Source waters were slightly enriched in chloride relative to seawater  
285 (~23.2 g/L in Jinata source water versus ~19.4 g/L in typical seawater), depleted in sulfate (~1.6  
286 g/L in Jinata versus ~2.7 g/L in seawater) but approached seawater concentrations downstream  
287 as mixing increased. Water emerging from the source was 63°C, very low in dissolved oxygen  
288 (~4.7 μM), at pH 5.4, and contained substantial concentrations of dissolved iron (~250 μM Fe<sup>2+</sup>).  
289 Dissolved organic carbon (DOC) in the source water was high (~1.31 mM). It is unknown  
290 whether this is produced *in situ* or whether the source water emerges with high DOC. Both DOC  
291 and DIC decrease along the outflow of the spring (Supplemental Table 1). After emerging from  
292 the source, the spring water exchanges gases with the air due to mixing associated with water  
293 flow and gas ebullition, and DO rose to 39 μM at the surface of the Source Pool. As water flows  
294 downstream from the Source Pool, it cools slightly, exchanges gases with the atmosphere, and  
295 intermittently mixes with seawater below Pool 1.

296 Both H<sub>2</sub> and CH<sub>4</sub> were qualitatively detected in bubbles from the Source Pool following  
297 initial sampling in September 2016. However, during subsequent analyses to quantify the gas  
298 composition in October 2017 and April 2018 the gas was determined to contain CO<sub>2</sub>, CH<sub>4</sub>, N<sub>2</sub>  
299 (Supplemental Table 2). This subsequent non-detection of H<sub>2</sub> may be related to temporal  
300 variability in the gas composition at Jinata (e.g. following tidal influence; significant variability  
301 was observed in the CO<sub>2</sub>:N<sub>2</sub> ratio between two sampling dates, Supplemental Table 2) or may  
302 reflect oxidation of H<sub>2</sub> between sampling and analysis. The detection limit of H<sub>2</sub> for these later  
303 measurements was ~1 nmol/cc (in the gas phase of our quantitative gas analyses, or ~1 nM in the  
304 aqueous phase, (3)), well above the energetic and ecological limits for hydrogenotrophic  
305 metabolisms (e.g. 53) leaving open the possibility of biologically significant H<sub>2</sub> fluxes at Jinata  
306 around the time of sampling. The oxidation of H<sub>2</sub> coupled to O<sub>2</sub> reduction is a  
307 thermodynamically favorable process even at very low substrate concentrations (e.g.  $\Delta_r G' < -375$   
308 kJ/mol with substrate concentrations of 0.1 nM H<sub>2(aq)</sub> and 0.1 μM O<sub>2(aq)</sub>, well below our limit of  
309 detection) (32)). Consistent with this thermodynamic favorability, biology has been shown to  
310 make use of this metabolism in environments such as hot springs with H<sub>2</sub> concentrations near our  
311 detection limits (21) and in Antarctic soils where microbes rely on uptake of trace atmospheric  
312 H<sub>2</sub> at concentrations around 190 ppbv (53). Therefore the trace amounts of H<sub>2</sub> which may be  
313 present in the source water at Jinata may be sufficient to support lithoautotrophy near the hot  
314 spring source in organisms possessing the genetic capacity for hydrogen oxidation as discussed  
315 below. Improved quantification of H<sub>2</sub> concentrations and measurement of hydrogenase activity  
316 and the productivity of hydrogenotrophic microbes will be needed in future to determine the  
317 relative contribution of hydrogen oxidation to productivity at Jinata.

318 ***16S rRNA and genome-resolved metagenomic sequencing***

319 16S rRNA and metagenomic sequencing of microbial communities at Jinata Onsen  
320 revealed a highly diverse community. In total, 16S rRNA amplicon sequencing recovered  
321 456,737 sequences from the 10 samples at Jinata (Supplemental Tables 3-5). Reads per sample  
322 following filtering for quality and removal of chimeras ranged from 2,076 for Pool 3 Sample B  
323 to 96,268 for Pool 1 Sample A (median 32,222, mean 35,479, and standard deviation 26,014).  
324 On average 65% of the microbial community was recovered from Jinata samples at the 99%  
325 OTU level based on the Good's Coverage statistic of the 16S rRNA gene (ranging from 50%  
326 coverage in the Outflow Sample A to 80% in the Pool 1 Sample A) and 82% at the 97% OTU  
327 level (69% for Pool 2 Sample B to 93% for the Pool 1 Sample B). MDS analysis (Supplemental  
328 Figure 1) demonstrates that samples from the same site are highly similar, and adjacent sites (e.g.  
329 Source Pool and Pool 1, Outflow and Pool 3) also show a high degree of similarity. However,  
330 there is a substantial transition in microbial community diversity between the most distant  
331 samples (e.g. Source Pool and Outflow).

332 Shotgun metagenomic sequencing of four samples from Jinata Onsen recovered 121 GB  
333 of data, forming a 1.48 Gb coassembly consisting of 1,531,443 contigs with an N50 of 1,494 bp.  
334 Nucleotide composition and differential coverage-based binning of the coassembly via multiple  
335 methods followed by dereplication and refinement resulted in a final set of 161 medium- or high-  
336 quality metagenome-assembled genomes (MAGs) following current standards (i.e. completeness  
337 >50% and contamination <10%) (7). These MAGs are from diverse phyla of Bacteria and  
338 Archaea (Figure 4); metagenome and MAG statistics with tentative taxonomic assignments for  
339 recovered MAGs are available in Supplementary Table 6, while MAGs of particular interest due  
340 to their potential contribution to primary productivity at this site or due to substantial genetic or  
341 metabolic novelty are discussed in depth below and shown in phylogenetic trees alongside  
342 reference strains in Figures 5-7.

## 343 344 **Discussion**

345 As Jinata spring water flows from source to ocean, it transitions from hot, low-oxygen,  
346 high-iron water to cooler, iron-depleted, oxygen-rich water in downstream regions (Figure 3).  
347 Following this geochemical transition is a major shift in the composition of the microbial  
348 community, from a high-temperature, putatively lithotrophic community which produces little  
349 visible biomass upstream, to a lower temperature, community with well-developed, thick  
350 microbial mats downstream. This shift in community composition is summarized in Figure 3,  
351 with complete diversity data in the Supplemental Information (including OTU counts per  
352 samples in Supplemental Table 4 and relative abundance binned at the class level in  
353 Supplemental Table 5). Below, we discuss the overall physiological and taxonomic trends across  
354 the spring sites as inferred from diversity and genomic analysis.

### 355 ***Potential for iron and hydrogen oxidation***

356 The hot spring water emerging at the Source Pool at Jinata contains abundant dissolved  
357 Fe<sup>2+</sup> and trace H<sub>2</sub> (though measurements of gas content varied, as discussed above) (Table 1).  
358 Although rates of carbon fixation were not measured, the appearance of zetaproteobacterial veils  
359 and streamers and molecular evidence for lithoautotrophic microbes suggests that these electron  
360 donors may fuel productivity and determine the microbial community upstream at the Source  
361 Pool and Pool 1, where microbial mats are not well developed. The low accumulation of visible  
362 biomass in upstream regions of Jinata are similar to other microbial ecosystems fueled by iron  
363 oxidation (e.g. Oku-Okuhachikuro Onsen, 130, Fuschna Spring, 44, and Jackson Creek, 96), in  
364 which lithotrophic communities appear capable of accumulating less organic carbon than



365 communities fueled by oxygenic photosynthesis (including those in downstream regions at  
366 Jinata).

367 Results of 16S rRNA sequencing indicate that the most abundant organisms in the Source  
368 Pool are members of the Aquificae family Hydrogenothermaceae (32% of reads in the Source  
369 Pool and 11.5% of reads in Pool 1). Members of this family of marine thermophilic lithotrophs  
370 are capable of iron and hydrogen oxidation, as well as heterotrophy (118) and may be utilizing  
371  $\text{Fe}^{2+}$ ,  $\text{H}_2$ , or dissolved organic carbon at Jinata. The seventh most abundant OTU in the Source  
372 Pool samples is a novel sequence 89% similar to a strain of *Persephonella* found in an alkaline  
373 hot spring in Papua New Guinea. *Persephonella* is a genus of thermophilic, microaerophilic  
374 hydrogen oxidizing bacteria within the Hydrogenothermaceae (38). Despite their abundance as  
375 assessed by 16S rRNA sequencing (Figure 3), only four partial Aquificae MAGs were recovered  
376 from Jinata of which only one (J026) was reasonably complete (~94%). Two Aquificae MAGs  
377 recovered Group 1 NiFe hydrogenase genes, which may be used in hydrogenotrophy; the  
378 absence of hydrogenases from the other MAGs may be related to their low completeness, or  
379 could reflect a utilization of iron or other electron donors and not  $\text{H}_2$  in these organisms.

380 The other most abundant organisms near the source are members of the  
381 Zetaproteobacteria—a group typified by the neutrophilic, aerobic iron-oxidizing genus  
382 *Mariprofundus* common in marine systems (29). Zetaproteobacteria accounted for 24% of 16S  
383 rRNA sequences in the Source Pool and 26.5% in Pool 1. All Zetaproteobacteria characterized to  
384 date are obligate iron- and/or hydrogen-oxidizing lithoautotrophs (85), suggesting that these  
385 organisms may play a substantial role in driving carbon fixation in the Source Pool and Pool 1.

386 Members of the Mariprofundaceae have been observed to have an upper temperature  
387 limit for growth of 30 °C (30), while Zetaproteobacteria are found at Jinata at temperatures up to  
388 63 °C. This currently represents a unique high-temperature environment for these organisms. In  
389 particular, the third most abundant OTU in the Source Pool and Pool 1 sample A is an unknown  
390 sequence that is 92% identical to a sequence from an uncultured zetaproteobacterium from a  
391 shallow hydrothermal vent in Papua New Guinea (82). This sequence likely marks a novel  
392 lineage of high-temperature iron-oxidizing Zetaproteobacteria.

393 The relative abundance of Hydrogenothermaceae drops off to less than 1% of sequences  
394 where microbial mats become well developed downstream of Pool 1, but Zetaproteobacteria  
395 continue to make up ~1-4% percent of reads in Pool 2 and Pool 3 where dissolved iron  
396 concentrations are still significant (Figure 3). It may be that the relative abundance change is due  
397 more to the increase in abundance of other organisms, rather than a drop in the number of  
398 Zetaproteobacteria or their ability to make a living oxidizing iron. This hypothesis awaits  
399 confirmation by a technique such as qPCR. In contrast, the absence of Hydrogenothermaceae  
400 downstream may be a real signal driven by the rapid disappearance of trace  $\text{H}_2$  as an electron  
401 donor. However, in both cases, a drop in relative abundance is likely related to the increasing  
402 total biomass (i.e. number of cells) downstream as Cyanobacteria become more productive,  
403 leading to sequences from Hydrogenothermaceae and Zetaproteobacteria being diluted out by  
404 increased numbers of Cyanobacteria, Chloroflexi, and other sequences.

405 Four MAGs affiliated with the Zetaproteobacteria were recovered from Jinata with  
406 completeness estimates by CheckM ranging from ~80 to ~97% (J005, J009, J030, and J098).  
407 While these MAGs did not recover 16S rRNA genes, RpoB- and concatenated ribosomal  
408 protein-based phylogenies illustrated that members of this group at Jinata Onsen do not belong to  
409 the characterized genera *Mariprofundus* or *Ghiorsea*, but instead form separate basal lineages  
410 within the Zetaproteobacteria (Figure 5). Despite their phylogenetic distinctness, these MAGs

411 largely recovered genes associated with aerobic iron oxidation as expected given the physiology  
412 of other Zetaproteobacteria. These include a terminal O<sub>2</sub> reductase from the C-family of heme  
413 copper oxidoreductases for respiration at low O<sub>2</sub> concentrations and Cyc2 cytochrome genes  
414 implicated in ferrous iron oxidation in Zetaproteobacteria and other taxa (e.g. Chlorobi) (41, 42,  
415 61). Hydrogenase catalytic subunit genes (neither [NiFe] nor [FeFe]) were not recovered in  
416 zetaproteobacterial MAGs even at high completeness, suggesting that these organisms are not  
417 hydrogenotrophic. Consistent with the obligately autotrophic lifestyle of previously characterized  
418 Zetaproteobacteria, J009 and J098 encode carbon fixation via the Calvin cycle. However, J005  
419 and J030 which did not recover genes for carbon fixation via the Calvin cycle (such as the large  
420 and small subunits of rubisco, phosphoribulose kinase, or carboxysome proteins). The high  
421 completeness of these MAGs (~94-97%) makes it unlikely that these genes would all fail to be  
422 recovered (MetaPOAP False Negative estimates 10<sup>-5</sup>-10<sup>-7</sup>). The absence of carbon fixation  
423 pathways from these genomes together with the availability of abundant dissolved organic  
424 carbon in Pool 1 (~1.3 mM) suggest that these organisms may be heterotrophic, a lifestyle not  
425 previously observed for members of the Zetaproteobacteria.

426 Seven MAGs were recovered from the enigmatic bacterial phylum Calditrichaeota (J004,  
427 J008, J042, J070, J075, J140, and J141) (Figure 6). While few members of Calditrichaeota have  
428 been isolated or sequenced, the best known of these is *Caldithrix abyssi* (84); this taxon was  
429 characterized as an anaerobic thermophile capable of lithoheterotrophic H<sub>2</sub> oxidation coupled to  
430 denitrification and organoheterotrophic fermentation (1, 81). The Calditrichaeota MAGs  
431 reported here are up to 97% complete (J004) and contain members with variable putative  
432 metabolic capabilities, potentially including aerobic hydrogen- or iron-oxidizing lithoautotrophy.  
433 In the Calditrichaeota MAGs recovered from Jinata Onsen, aerobic respiration via A-family  
434 heme copper oxidoreductases could potentially be coupled to autotrophic hydrogen oxidation  
435 (via the Group 1d NiFe hydrogenase in J042) or iron oxidation (via the *pioA* gene in J075);  
436 however, *Caldithrix abyssi* appears incapable of aerobic respiration despite encoding an A-  
437 family heme copper oxidoreductase (70). A MAG from a member of Calditrichaeota has  
438 previously been recovered from Chocolate Pots hot spring in Yellowstone National Park (34);  
439 together with the data presented here this suggests that this phylum may be a common member  
440 of microbial communities in iron-rich hot springs. Unlike previously described Calditrichaeota  
441 which are all heterotrophic (81), most of the Calditrichaeota MAGs reported here possess a  
442 putative capacity for carbon fixation via the Calvin cycle. J004 is closely related to *Caldithrix*  
443 *abyssi*, while the other MAGs form two distinct but related clades (Figure 6).

444

#### 445 ***Oxygenic photosynthesis***

446 Cyanobacteria are nearly absent from near the Source Pool, but are observed in low  
447 numbers in Pool 1 and become abundant starting in Pool 2. The most abundant Cyanobacteria  
448 present are predominantly members of the Nostocales. This group includes *Leptolyngbya* and  
449 *Phormidium*, genera of filamentous non-heterocystous Cyanobacteria that are present in other  
450 hot springs of similar temperatures (e.g. 6, 98, 130). Diverse cyanobacterial MAGs were  
451 recovered, including members of the orders Pleurocapsales (J083), Chroococcales (J003 and  
452 J149), and Oscillatoriales (J007, J055, and J069). In the Outflow samples, chloroplast sequences  
453 are abundant, most closely related to the diatom *Melosira*.

454 Cyanobacteria are sometimes underrepresented in 16S rRNA amplicon sequencing  
455 datasets as a result of poor DNA yield or amplification biases (e.g. 88, 122), but the low

456 abundance of Cyanobacteria near the Source Pool was confirmed by fluorescent microscopy, in  
457 which cells displaying cyanobacterial autofluorescence were observed abundantly in samples  
458 from the downstream samples but not in the Source Pool (Supplemental Figure 2). Thick  
459 microbial mats first appear in Pool 2 when Cyanobacteria become abundant, suggesting that  
460 oxygenic photosynthesis fuels more net carbon fixation than lithotrophy in these environments.  
461 Previously, it has been suggested that high ferrous iron concentrations are toxic to  
462 Cyanobacteria, and that this would have greatly reduced their productivity under ferruginous  
463 ocean conditions such as those that may have persisted through much of the Archean era (117).  
464 The abundant Cyanobacteria observed to be active at Jinata under high iron concentrations  
465 suggest that Cyanobacteria can adapt to ferruginous conditions, and therefore iron toxicity might  
466 not inhibit Cyanobacteria over geological timescales. Indeed, the soluble iron concentrations  
467 observed at Jinata are higher (150-250  $\mu\text{M}$ ) than predicted for the Archean oceans (<120  $\mu\text{M}$ , 49)  
468 or observed at other iron-rich hot springs (~100-200  $\mu\text{M}$ , 91, 130), making Jinata an excellent  
469 test case for determining the ability of Cyanobacteria to adapt to high iron concentrations.  
470 Culture-based physiological experiments may be useful to determine whether Jinata  
471 Cyanobacteria utilize similar strategies to other iron-tolerant strains (e.g. by those in Chocolate  
472 Pots Hot Spring, 91, or the ferric iron-tolerant *Leptolyngbya*-relative *Marsacia ferruginosa*, 9) or  
473 whether Jinata strains possess unique adaptations that allow them to grow at higher iron  
474 concentrations than known for other environmental Cyanobacteria strains. This will in turn  
475 provide insight into whether iron tolerance is due to evolutionarily conserved strategies or  
476 whether this is a trait that has evolved convergently multiple times.

#### 477 ***Diverse novel Chloroflexi from Jinata Onsen***

478 In addition to the primary phototrophic and lithotrophic carbon fixers at Jinata, 16S  
479 rRNA and metagenomic data sets revealed diverse novel lineages within the Chloroflexi phylum.  
480 A total of 23 Chloroflexi MAGs were recovered, introducing substantial genetic and metabolic  
481 diversity that expands our understanding of this group. While the best known members of this  
482 phylum are Type 2 Reaction Center-containing lineages such as *Chloroflexus* and *Roseiflexus*  
483 within the class Chloroflexia (e.g. 121), phototrophy is not a synapomorphy of the Chloroflexi  
484 phylum or even the Chloroflexia class (e.g. 126) and most of the diversity of the phylum belongs  
485 to several other classes made up primarily of nonphototrophic lineages (131). The bulk of  
486 Chloroflexi diversity recovered from Jinata belongs to “subphylum I”, a broad group of  
487 predominantly nonphototrophic lineages that was originally described based on the class- or  
488 order-level lineages Anaerolineae and Caldilineae (141), but also encompasses the related groups  
489 Ardentecatenia, Thermoflexia, and *Candidatus* Thermofonsia (22, 63, 131).

490 16S rRNA analysis indicates that members of Anaerolineae and *Candidatus*  
491 Thermofonsia (annotated by Silva and GTDB-Tk as the order SBR1031) are fairly abundant at  
492 Jinata, with Anaerolineae at ~3% relative abundance in the Source and Pool 1 and *Ca.*  
493 Thermofonsia at ~3.5% relative abundance in Pool 2 and Pool 3. Three MAGs recovered from  
494 Jinata (J082, J097, and J130) are associated with the Anaerolineae class as determined by RpoB  
495 and concatenated ribosomal protein phylogenies, along with seven associated with *Ca.*  
496 Thermofonsia (J027, J033, J036, J038, J039, J064, and J076). Particularly notable among these  
497 MAGs is J036, a close relative of the phototrophic *Ca. Roseilinea gracile* (68, 119, 120). J036  
498 contains a 16S rRNA gene that is 96% similar to that of *Ca. Roseilinea gracile*, and two-way  
499 AAI estimates (97) showed 73.6% similarity between the two strains, indicating these strains are  
500 probably best classified as distinct species within the same genus. Unlike other phototrophs in  
501 the Chloroflexi phylum that are capable of photoautotrophy via the 3-hydroxypropionate bicycle

502 or the Calvin Cycle (67, 102), J036 and *Ca. Roseilinea gracile* do not encode carbon fixation and  
503 are likely photoheterotrophic. Previous analyses suggested that the *Roseilinea* lineage belongs to  
504 the Anaerolineae (68) or Thermofonsia (131); however, our updated phylogeny presented here  
505 places J036 and *Roseilinea* in a separate lineage along with J033 and J162, diverging just outside  
506 of the Anaerolineae+Thermofonsia clade, suggesting that these strains may instead be yet  
507 another class- or order-level lineage within the broader “subphylum I” of Chloroflexi (Figure 7),  
508 an interpretation supported by analysis via GTDB-Tk which places these genomes outside of  
509 characterized clades (Supplemental Table 6).

510 The Chloroflexi class *Ardenticatenia* was first described from an isolate from an iron-rich  
511 Japanese hydrothermal field (63) and has since been recovered from sulfidic hot springs as well  
512 (132). Members of *Ardenticatenia* were present at up to 1.2% relative abundance in Pool 3 in  
513 16S amplicon data. A MAG closely related to *Ardenticatena maritima* was recovered from Jinata  
514 Onsen, J129. While *Ardenticatena maritima* 110S contains a complete denitrification pathway  
515 (47), MAG J129 did not recover any denitrification genes. This could be related to the relatively  
516 low completeness of this MAG (~70%), but False Negative estimates by MetaPOAP (134)  
517 indicates that the probability that all four steps in the canonical denitrification pathway would fail  
518 to be recovered in J129 given their presence in the source genome is less than 0.8%, suggesting  
519 that most if not all denitrification genes are absent and that the capacity for denitrification is not  
520 universal within members of *Ardenticatena*. This would be consistent with broad trends in the  
521 apparently frequent modular horizontal gene transfer of partial denitrification pathways between  
522 disparate microbial lineages to drive rapid adaptation and metabolic flexibility of aerobic  
523 organisms in microoxic and anoxic environments, for reasons that are still not well established  
524 (19, 113).

525 Members of the Chloroflexi class *Caldilineae* were present at up to 0.5% abundance at  
526 Jinata in the 16S rRNA dataset. Members of the *Caldilineae* have previously been isolated from  
527 intertidal hot springs in Iceland (57) and Japanese hot springs (99). Characterized organisms in  
528 this class are filamentous, anaerobic, or facultatively aerobic heterotrophs (39, 57, 99); and  
529 therefore these taxa may play a role in degrading biomass within low-oxygen regions of  
530 microbial mats at Jinata. Three MAGs were recovered that form a deeply branching lineage with  
531 the *Caldilineae* class (J095, J111, and J123), sister to the previously characterized genera  
532 *Caldilinea* and *Litorilinea*. Like other members of the *Caldilineae*, these strains encode aerobic  
533 respiration via A-family heme copper oxidoreductases and both a *bc* complex III and an  
534 alternative complex III, and are therefore likely at least facultatively aerobic. J095 also encodes  
535 carbon fixation via the Calvin cycle as well as a Group 1f NiFe hydrogenase, suggesting a  
536 potential capability for lithoautotrophy by hydrogen oxidation, expanding the known metabolic  
537 diversity of this class and the Chloroflexi phylum as a whole.

538 MAG J114 branches at the base of subphylum I of the Chloroflexi, potentially the first  
539 member of a novel class-level lineage. The divergence between Anaerolineae and *Caldilineae*  
540 has been estimated to have occurred on the order of 1.7 billion years ago (102). The phylogenetic  
541 placement of J114 suggests that it diverged from other members of subphylum I even earlier, and  
542 it may be a good target for future investigation to assess aspects of the early evolution of the  
543 Chloroflexi phylum. J114 encodes aerobic respiration via an A-family heme copper  
544 oxidoreductase and an alternative complex III like many other nonphototrophic Chloroflexi  
545 lineages (e.g. 126, 131) as well as a Group 1f NiFe hydrogenase and carbon fixation via the



546 Calvin Cycle, suggesting the capacity for aerobic hydrogen-oxidizing autotrophy—a lifestyle not  
547 previously described for members of the Chloroflexi.

548

### 549 **Conclusions**

550 To our knowledge, this is the first overall geomicrobiological characterization of Jinata  
551 Onsen, providing baseline descriptions of geochemistry and microbial diversity in order to  
552 establish a series of testable hypotheses which can be addressed by future studies. We have also  
553 provided genome-resolved metagenomics sequencing of this site focusing on members of the  
554 microbial community predicted to be responsible for the bulk of primary productivity in this  
555 system along with other organisms belonging to novel or under-characterized lineages. However,  
556 this is just a subset of the diverse microbial populations at Jinata Onsen; many more MAGs from  
557 across the tree of life were recovered than are discussed in detail here but which may be of use to  
558 others (Figure 4, Supplemental Table 6).

559 The diversity of iron oxidizing bacteria at Jinata is different than in other Fe<sup>2+</sup>-rich  
560 springs and environments. For example, in freshwater systems such as Oku-Okuhachikurou  
561 Onsen in Akita Prefecture, Japan (130), and Budo Pond in Hiroshima, Japan (60), iron oxidation  
562 is driven primarily by the activity of chemoautotrophs such as members of the Gallionellaceae.  
563 In contrast, at Chocolate Pots hot spring in Yellowstone National Park, USA, iron oxidation is  
564 primarily abiotic, driven by O<sub>2</sub> produced by Cyanobacteria, with only a small contribution from  
565 iron oxidizing bacteria (34, 123). The distinct iron-oxidizing community at Jinata Onsen may be  
566 related to the salinity of the spring water, or biogeographically by access to the ocean, as  
567 Zetaproteobacteria are typically found in marine settings, particularly in deep ocean basins  
568 associated with hydrothermal iron sources (30). Despite the taxonomically distinct iron oxidizer  
569 communities between Jinata and Oku-Okuhachikurou Onsen, both communities support only  
570 limited visible biomass in regions dominated by iron oxidizers (130), perhaps reflecting the  
571 shared biochemical and bioenergetic challenges of iron oxidation incurred by diverse iron  
572 oxidizing bacteria including Gallionellaceae and Zetaproteobacteria (5, 30, 130). Future work  
573 focused on isolation and physiological characterization of microbes, quantification of rates and  
574 determination of microbial drivers of carbon fixation and aerobic and anaerobic heterotrophy,  
575 and carbon isotope profiling of organic and inorganic species along the flow path of the hot  
576 spring will be necessary to fully characterize the activity of microbes at Jinata and to fully  
577 compare this system to other areas with high dissolved ferrous iron concentrations (e.g. Oku-  
578 Okuhachikurou Onsen, 130, Fuschna Spring, 44, Jackson Creek, 96, and Chocolate Pots Hot  
579 Spring, 34, 123).

580 The relatively high concentrations of dissolved organic carbon (DOC) measured in Pool 1  
581 (~1.3 mM) may stimulate heterotrophic activity by the microbial community at Jinata, coupled to  
582 aerobic or anaerobic respiration (such as dissimilatory iron reduction, as observed in other iron-  
583 rich hot springs, e.g. 33), resulting in the drawdown of DOC downstream. The source of this  
584 DOC is unclear; future work will be necessary to determine whether DOC is present in the  
585 source water or if it is produced *in situ* by the microbial community in the Source Pool and Pool  
586 1. Future work is also needed to evaluate the potential for dissimilatory iron reduction and other  
587 anaerobic metabolisms at this site.

588 Throughout Earth history, the metabolic opportunities available to life, and the resulting  
589 organisms and metabolisms responsible for driving primary productivity, have been shaped by  
590 the geochemical conditions of the atmosphere and oceans. The modern, sulfate-rich, well-  
591 oxygenated oceans we see today reflect a relatively recent state—one typical of only the last few



592 hundred million years (e.g. 79). For the first half of Earth history, until ~2.3 billion years ago  
593 (Ga), the atmosphere and oceans were anoxic (54), and the oceans were largely rich in dissolved  
594 iron but poor in sulfur (124). At this time, productivity was low and fueled by metabolisms such  
595 as methanogenesis and anoxygenic photosynthesis (14, 66, 135). Following the expansion of  
596 oxygenic photosynthesis by Cyanobacteria and higher primary productivity around the Great  
597 Oxygenation Event ~2.3 Ga (20, 31, 128, 137), the atmosphere and surface ocean accumulated  
598 some oxygen, and the ocean transitioned into a state with oxygenated surface waters but often  
599 anoxic deeper waters, rich in either dissolved iron or sulfide (13, 55, 56, 92). At Jinata Onsen,  
600 this range of geochemical conditions is recapitulated over just a few meters, providing a useful  
601 test case for probing the shifts of microbial productivity over the course of Earth history. In  
602 particular, the concomitant increase in visible biomass at Jinata as the community shifts from  
603 lithotrophy toward water-oxidizing phototrophy (i.e. oxygenic photosynthesis) is consistent with  
604 estimates for greatly increased primary production following the evolution and expansion of  
605 Cyanobacteria around the GOE (20, 101, 106, 128, 135, 137).

606 The dynamic abundances of redox-active compounds including oxygen, iron, and  
607 hydrogen at Jinata may not only be analogous to conditions on the early Earth, but may have  
608 relevance for potentially habitable environments on Mars as well. Early Mars is thought to have  
609 supported environments with metabolic opportunities provided by the redox gradient between  
610 the oxidizing atmosphere and abundant electron donors such as ferrous iron and molecular  
611 hydrogen sourced from water/rock interactions (e.g. 51), and production of these substrates may  
612 continue today (24, 111), potentially supporting past or present life in the Martian subsurface  
613 (112). Understanding the potential productivity of microbial communities fueled by lithotrophic  
614 metabolisms is critical for setting expectations of the presence and size of potential biospheres on  
615 other worlds and early in Earth history (e.g. 135, 136, 137). Uncovering the range of microbial  
616 metabolisms present under the environmental conditions at Jinata, and their relative contributions  
617 to primary productivity, may therefore find application to predicting environments on Mars most  
618 able to support productive microbial communities.

619

#### 620 **Data availability:**

621 Raw 16S rRNA, raw metagenomic sequence data, and MAGs have been uploaded and made  
622 publicly available on NCBI under Project Number PRJNA392119 (genome accession numbers  
623 can be found in Supplemental Table 6).

624

#### 625 **Acknowledgements:**

626 LMW acknowledges support from NASA NESSF (#NNX16AP39H), NSF (#OISE 1639454), NSF  
627 GROW (#DGE 1144469), Lewis and Clark Fund for Exploration and Field Research in Astrobiology, the  
628 ELSI Origins Network, and an Agouron Institute postdoctoral fellowship. WWF acknowledges the  
629 support of NASA Exobiology award #NNX16AJ57G, the David and Lucile Packard Foundation, and the  
630 Simons Collaboration on the Origins of Life. MN and YU acknowledge the support of the Japan Society  
631 for the Promotion of Science (JP17K14412, JP17H06105)

632

#### 633 **References**

- 634 1. Alauzet, C. and Jumas-Bilak, E., 2014. The phylum Deferribacteres and the genus *Caldithrix*.  
635 In *The prokaryotes* (pp. 595-611). Springer, Berlin, Heidelberg.
- 636 2. Alneberg, J., Bjarnason, B.S., de Bruijn, I., Schirmer, M., Quick, J., Ijaz, U.Z., Loman, N.J.,  
637 Andersson, A.F. and Quince, C., 2013. CONCOCT: clustering contigs on coverage and  
638 composition. *arXiv preprint arXiv:1312.4038*.

- 639 3. Amend, J.P. and Shock, E.L., 2001. Energetics of overall metabolic reactions of thermophilic  
640 and hyperthermophilic Archaea and Bacteria. *FEMS Microbiol. Rev.*, 25(2), pp.175-243.
- 641 4. Beam, J.P., Jay, Z.J., Schmid, M.C., Rusch, D.B., Romine, M.F., de M Jennings, R.,  
642 Kozubal, M.A., Tringe, S.G., Wagner, M. and Inskeep, W.P., 2016. Ecophysiology of an  
643 uncultivated lineage of Aigarchaeota from an oxic, hot spring filamentous  
644 'streamer' community. *ISME J.*, 10(1), p.210.
- 645 5. Bird, L.J., Bonnefoy, V. and Newman, D.K., 2011. Bioenergetic challenges of microbial iron  
646 metabolisms. *Trends Microbiol.*, 19(7), pp.330-340.
- 647 6. Bosak, T., Liang, B., Wu, T.D., Templar, S.P., Evans, A., Vali, H., Guerquin - Kern, J.L.,  
648 Klepac - Ceraj, V., Sim, M.S. and Mui, J., 2012. Cyanobacterial diversity and activity in  
649 modern conical microbialites. *Geobiology*, 10(5), pp.384-401.
- 650 7. Bowers, R.M., Kyrpides, N.C., Stepanauskas, R., et al., 2017. Minimum information about a  
651 single amplified genome (MISAG) and a metagenome-assembled genome (MIMAG) of  
652 bacteria and archaea. *Nat. Biotechnol.*, 35(8), p.725.
- 653 8. Broda, E., 1977. Two kinds of lithotrophs missing in nature. *Z. Allg. Mikrobiol.*, 17(6),  
654 pp.491-493.
- 655 9. Brown, I.I., Bryant, D.A., Casamatta, D., et al., 2010. Polyphasic characterization of a  
656 thermotolerant siderophilic filamentous cyanobacterium that produces intracellular iron  
657 deposits. *Appl. Environ. Microbiol.*, 76(19), pp.6664-6672.
- 658 10. Bryant, D.A., Costas, A.M.G., Maresca, J.A., et al., 2007. Candidatus Chloracidobacterium  
659 thermophilum: an aerobic phototrophic acidobacterium. *Science*, 317(5837), pp.523-526.
- 660 11. Bushnell, B. "BBMap short read aligner." *University of California, Berkeley, California.*  
661 *URL <http://sourceforge.net/projects/bbmap>* (2016).
- 662 12. Camacho, C., Coulouris, G., Avagyan, V., Ma, N., Papadopoulos, J., Bealer, K. and Madden,  
663 T.L., 2009. BLAST+: architecture and applications. *BMC Bioinf.*, 10(1), p.421.
- 664 13. Canfield, D.E., 1998. A new model for Proterozoic ocean chemistry. *Nature*, 396(6710),  
665 p.450.
- 666 14. Canfield, D.E., Rosing, M.T. and Bjerrum, C., 2006. Early anaerobic metabolisms. *Philos.*  
667 *Trans. R. Soc., B*, 361(1474), pp.1819-1836.
- 668 15. Caporaso, J.G., Kuczynski, J., Stombaugh, J., et al., 2010. QIIME allows analysis of high-  
669 throughput community sequencing data. *Nat. Methods*, 7(5), p.335.
- 670 16. Caporaso, J.G., Lauber, C.L., Walters, W.A., et al., 2012. Ultra-high-throughput microbial  
671 community analysis on the Illumina HiSeq and MiSeq platforms. *ISME J.*, 6(8), p.1621.
- 672 17. Case, R.J., Boucher, Y., Dahllöf, I., Holmström, C., Doolittle, W.F. and Kjelleberg, S., 2007.  
673 Use of 16S rRNA and rpoB genes as molecular markers for microbial ecology studies. *Appl.*  
674 *Environ. Microbiol.*, 73(1), pp.278-288.
- 675 18. Chang, Y.J., Land, M., Hauser, L., et al., 2011. Non-contiguous finished genome sequence  
676 and contextual data of the filamentous soil bacterium *Ktedonobacter racemifer* type strain  
677 (SOSP1-21 T). *Stand. Genomic Sci.*, 5(1), p.97.
- 678 19. Chen, J. and Strous, M., 2013. Denitrification and aerobic respiration, hybrid electron  
679 transport chains and co-evolution. *Biochim. Biophys. Acta, Bioenerg.*, 1827(2), pp.136-144
- 680 20. Crockford, P.W., Hayles, J.A., Bao, H., Planavsky, N.J., Bekker, A., Fralick, P.W.,  
681 Halverson, G.P., Bui, T.H., Peng, Y. and Wing, B.A., 2018. Triple oxygen isotope evidence  
682 for limited mid-Proterozoic primary productivity. *Nature*, 559(7715), p.613.

- 683 21. D'Imperio, S., Lehr, C.R., Oduro, H., Druschel, G., Köhl, M. and McDermott, T.R., 2008.  
684 Relative importance of H<sub>2</sub> and H<sub>2</sub>S as energy sources for primary production in geothermal  
685 springs. *Appl. Environ. Microbiol.*, 74(18), pp.5802-5808.
- 686 22. Dodsworth, J.A., Gevorkian, J., Despujos, F., Cole, J.K., Murugapiran, S.K., Ming, H., Li,  
687 W.J., Zhang, G., Dohnalkova, A. and Hedlund, B.P., 2014. Thermoflexus hugenholtzii gen.  
688 nov., sp. nov., a thermophilic, microaerophilic, filamentous bacterium representing a novel  
689 class in the Chloroflexi, Thermoflexia classis nov., and description of Thermoflexaceae fam.  
690 nov. and Thermoflexales ord. nov. *Int. J. Syst. Evol. Microbiol.*, 64(6), pp.2119-2127.
- 691 23. Dunfield, P.F., Tamas, I., Lee, K.C., Morgan, X.C., McDonald, I.R. and Stott, M.B., 2012.  
692 Electing a candidate: a speculative history of the bacterial phylum OP10. *Environ.*  
693 *Microbiol.*, 14(12), pp.3069-3080.
- 694 24. Dzaugis, M., Spivack, A.J. and D'Hondt, S., 2018. Radiolytic H<sub>2</sub> Production in Martian  
695 Environments. *Astrobiology*, 18(9), pp.1137-1146.
- 696 25. Edgar, R.C., 2004. MUSCLE: multiple sequence alignment with high accuracy and high  
697 throughput. *Nucleic Acids Res.*, 32(5), pp.1792-1797.
- 698 26. Edgar, R.C., 2010. Search and clustering orders of magnitude faster than  
699 BLAST. *Bioinformatics*, 26(19), pp.2460-2461.
- 700 27. Ehrenreich, A. and Widdel, F., 1994. Anaerobic oxidation of ferrous iron by purple bacteria,  
701 a new type of phototrophic metabolism. *Appl. Environ. Microbiol.*, 60(12), pp.4517-4526.
- 702 28. Eloë-Fadrosch, E.A., Paez-Espino, D., Jarett, J., et al., 2016. Global metagenomic survey  
703 reveals a new bacterial candidate phylum in geothermal springs. *Nat. Commun.*, 7, p.10476.
- 704 29. Emerson, D., Rentz, J.A., Lilburn, T.G., Davis, R.E., Aldrich, H., Chan, C. and Moyer, C.L.,  
705 2007. A novel lineage of proteobacteria involved in formation of marine Fe-oxidizing  
706 microbial mat communities. *PloS One*, 2(8), p.e667.
- 707 30. Emerson, D., Fleming, E.J. and McBeth, J.M., 2010. Iron-oxidizing bacteria: an  
708 environmental and genomic perspective. *Annu. Rev. Microbiol.*, 64, pp.561-583.
- 709 31. Fischer, W.W., Hemp, J. and Johnson, J.E., 2016. Evolution of oxygenic  
710 photosynthesis. *Annu. Rev. Earth Planet. Sci.*, 44, pp.647-683.
- 711 32. Flamholz, A., Noor, E., Bar-Even, A. and Milo, R., 2011. eQuilibrator—the biochemical  
712 thermodynamics calculator. *Nucleic Acids Res.*, 40(D1), pp.D770-D775.
- 713 33. Fortney, N.W., He, S., Converse, B.J., Beard, B.L., Johnson, C.M., Boyd, E.S. and Roden,  
714 E.E., 2016. Microbial Fe (III) oxide reduction potential in Chocolate Pots hot spring,  
715 Yellowstone National Park. *Geobiology*, 14(3), pp.255-275.
- 716 34. Fortney, N.W., He, S., Converse, B.J., Boyd, E.S. and Roden, E.E., 2018. Investigating the  
717 Composition and Metabolic Potential of Microbial Communities in Chocolate Pots Hot  
718 Springs. *Front. Microbiol.*, 9.
- 719 35. Fullerton, H., Hager, K.W., McAllister, S.M. and Moyer, C.L., 2017. Hidden diversity  
720 revealed by genome-resolved metagenomics of iron-oxidizing microbial mats from Lō' ihi  
721 Seamount, Hawai'i. *ISME J*, 11(8), p.1900.
- 722 36. Giovannoni, S.J., Revsbech, N.P., Ward, D.M. and Castenholz, R.W., 1987. Obligately  
723 phototrophic Chloroflexus: primary production in anaerobic hot spring microbial mats. *Arch.*  
724 *Microbiol.*, 147(1), pp.80-87.
- 725 37. Good, I.J., 1953. The population frequencies of species and the estimation of population  
726 parameters. *Biometrika*, 40(3-4), pp.237-264.
- 727 38. Götz, D., Banta, A., Beveridge, T.J., Rushdi, A.I., Simoneit, B.R.T. and Reysenbach, A.L.,  
728 2002. Persephonella marina gen. nov., sp. nov. and Persephonella guaymasensis sp. nov., two

- 729 novel, thermophilic, hydrogen-oxidizing microaerophiles from deep-sea hydrothermal  
730 vents. *Int. J. Syst. Evol. Microbiol.*, 52(4), pp.1349-1359.
- 731 39. Grégoire, P., Bohli, M., Cayol, J.L., et al., 2011. *Caldilinea tarbellica* sp. nov., a filamentous,  
732 thermophilic, anaerobic bacterium isolated from a deep hot aquifer in the Aquitaine  
733 Basin. *Int. J. Syst. Evol. Microbiol.*, 61(6), pp.1436-1441.
- 734 40. Grouzdev, D.S., Rysina, M.S., Bryantseva, I.A., Gorlenko, V.M. and Gaisin, V.A., 2018.  
735 Draft genome sequences of ‘*Candidatus Chloroploca asiatica*’ and ‘*Candidatus Viridilinea*  
736 *mediisalina*’, candidate representatives of the Chloroflexales order: phylogenetic and  
737 taxonomic implications. *Stand. Genomic Sci.*, 13(1), p.24.
- 738 41. Han, H., Hemp, J., Pace, L.A., Ouyang, H., Ganesan, K., Roh, J.H., Daldal, F., Blanke, S.R.  
739 and Gennis, R.B., 2011. Adaptation of aerobic respiration to low O<sub>2</sub> environments. *Proc.*  
740 *Natl. Acad. Sci.*, 108(34), pp.14109-14114.
- 741 42. He, S., Barco, R.A., Emerson, D. and Roden, E.E., 2017. Comparative genomic analysis of  
742 neutrophilic iron (II) oxidizer genomes for candidate genes in extracellular electron  
743 transfer. *Front. Microbiol.*, 8, p.1584.
- 744 43. Hedlund, B.P., Murugapiran, S.K., Huntemann, M., et al., 2015. High-quality draft genome  
745 sequence of *Kallotenuis papyrolyticum* JKG1T reveals broad heterotrophic capacity focused  
746 on carbohydrate and amino acid metabolism. *Genome Announcements*, 3(6), pp.e01410-15.
- 747 44. Hegler, F., Lösekann-Behrens, T., Hanselmann, K., Behrens, S. and Kappler, A., 2012.  
748 Influence of seasonal and geochemical changes on iron geomicrobiology of an iron-  
749 carbonate mineral water spring. *Appl. Environ. Microbiol.*, pp.AEM-01440.
- 750 45. Hemp, J., Ward, L.M., Pace, L.A. and Fischer, W.W., 2015. Draft genome sequence of  
751 *Levilinea saccharolytica* KIBI-1, a member of the Chloroflexi class *Anaerolineae*. *Genome*  
752 *Announcements*, 3(6), pp.e01357-15.
- 753 46. Hemp, J., Ward, L.M., Pace, L.A. and Fischer, W.W., 2015. Draft genome sequence of  
754 *Ornatilinea apprima* P3M-1, an anaerobic member of the Chloroflexi class  
755 *Anaerolineae*. *Genome Announcements*, 3(6), pp.e01353-15.
- 756 47. Hemp, J., Ward, L.M., Pace, L.A. and Fischer, W.W., 2015. Draft genome sequence of  
757 *Ardenticatena maritima* 110S, a thermophilic nitrate- and iron-reducing member of the  
758 Chloroflexi class *Ardenticatena*. *Genome Announcements*, 3(6), pp.e01347-15.
- 759 48. Hill, M.O., 1973. Diversity and evenness: a unifying notation and its  
760 consequences. *Ecology*, 54(2), pp.427-432.
- 761 49. Holland, H.D., 1984. *The chemical evolution of the atmosphere and oceans*. Princeton  
762 University Press.
- 763 50. Hug, L.A., Baker, B.J., Anantharaman, K., et al., 2016. A new view of the tree of life. *Nat.*  
764 *Microbiol.*, 1(5), p.16048.
- 765 51. Hurowitz, J.A., Fischer, W.W., Tosca, N.J. and Milliken, R.E., 2010. Origin of acidic surface  
766 waters and the evolution of atmospheric chemistry on early Mars. *Nat. Geosci.*, 3(5), p.323.
- 767 52. Inskeep, W.P., Ackerman, G.G., Taylor, W.P., Kozubal, M., Korf, S. and Macur, R.E., 2005.  
768 On the energetics of chemolithotrophy in nonequilibrium systems: case studies of geothermal  
769 springs in Yellowstone National Park. *Geobiology*, 3(4), pp.297-317.
- 770 53. Ji, M., Greening, C., Vanwonterghem, I., et al., 2017. Atmospheric trace gases support  
771 primary production in Antarctic desert surface soil. *Nature*, 552(7685), p.400.
- 772 54. Johnson, J.E., Gerpheide, A., Lamb, M.P. and Fischer, W.W., 2014. O<sub>2</sub> constraints from  
773 Paleoproterozoic detrital pyrite and uraninite. *Geol. Soc. Am. Bull.*, 126(5-6), pp.813-830.



- 774 55. Johnston, D.T., Wolfe-Simon, F., Pearson, A. and Knoll, A.H., 2009. Anoxygenic  
775 photosynthesis modulated Proterozoic oxygen and sustained Earth's middle age. *Proc.*  
776 *Natl. Acad. Sci.*, 106(40), pp.16925-16929.
- 777 56. Johnston, D.T., Poulton, S.W., Dehler, C., Porter, S., Husson, J., Canfield, D.E. and Knoll,  
778 A.H., 2010. An emerging picture of Neoproterozoic ocean chemistry: Insights from the  
779 Chuar Group, Grand Canyon, USA. *Earth Planet. Sci. Lett.*, 290(1-2), pp.64-73.
- 780 57. Kale, V., Björnsdóttir, S.H., Friðjónsson, Ó.H., Pétursdóttir, S.K., Ómarsdóttir, S. and  
781 Hreggviðsson, G.Ó., 2013. Litorilinea aerophila gen. nov., sp. nov., an aerobic member of the  
782 class Caldilineae, phylum Chloroflexi, isolated from an intertidal hot spring. *Int. J. Syst.*  
783 *Evol. Microbiol.*, 63(3), pp.1149-1154.
- 784 58. Kaneoka, I., Isshiki, N. and Zashu, S., 1970. K-Ar ages of the Izu-Bonin islands. *Geochem.*  
785 *J.*, 4(2), pp.53-60.
- 786 59. Kang, D.D., Froula, J., Egan, R. and Wang, Z., 2015. MetaBAT, an efficient tool for  
787 accurately reconstructing single genomes from complex microbial communities. *PeerJ*, 3,  
788 p.e165.
- 789 60. Kato, S., Kikuchi, S., Kashiwabara, T., Takahashi, Y., Suzuki, K., Itoh, T., Ohkuma, M. and  
790 Yamagishi, A., 2012. Prokaryotic abundance and community composition in a freshwater  
791 iron-rich microbial mat at circumneutral pH. *Geomicrobiol. J.*, 29(10), pp.896-905.
- 792 61. Kato, S., Ohkuma, M., Powell, D.H., Krepski, S.T., Oshima, K., Hattori, M., Shapiro, N.,  
793 Woyke, T. and Chan, C.S., 2015. Comparative genomic insights into ecophysiology of  
794 neutrophilic, microaerophilic iron oxidizing bacteria. *Front. Microbiol.*, 6, p.1265.
- 795 62. Katoh, K., Misawa, K., Kuma, K.I. and Miyata, T., 2002. MAFFT: a novel method for rapid  
796 multiple sequence alignment based on fast Fourier transform. *Nucleic Acids Res.*, 30(14),  
797 pp.3059-3066.
- 798 63. Kawaichi, S., Ito, N., Kamikawa, R., Sugawara, T., Yoshida, T. and Sako, Y., 2013.  
799 *Ardenticatena maritima* gen. nov., sp. nov., a ferric iron- and nitrate-reducing bacterium of the  
800 phylum 'Chloroflexi' isolated from an iron-rich coastal hydrothermal field, and description of  
801 *Ardenticatena classis* nov. *Int. J. Syst. Evol. Microbiol.*, 63(8), pp.2992-3002.
- 802 64. Kawaichi, S., Yoshida, T., Sako, Y. and Nakamura, R., 2015. Draft genome sequence of a  
803 heterotrophic facultative anaerobic thermophilic bacterium, *Ardenticatena maritima* strain  
804 110ST. *Genome Announcements*, 3(5), pp.e01145-15.
- 805 65. Kawasumi, T., Igarashi, Y., Kodama, T. and Minoda, Y., 1980. Isolation of strictly  
806 thermophilic and obligately autotrophic hydrogen bacteria. *Agric. Biol. Chem.*, 44(8),  
807 pp.1985-1986.
- 808 66. Kharecha, P., Kasting, J. and Siefert, J., 2005. A coupled atmosphere-ecosystem model of  
809 the early Archean Earth. *Geobiology*, 3(2), pp.53-76.
- 810 67. Klatt, C.G., Bryant, D.A. and Ward, D.M., 2007. Comparative genomics provides evidence  
811 for the 3-hydroxypropionate autotrophic pathway in filamentous anoxygenic phototrophic  
812 bacteria and in hot spring microbial mats. *Environ. Microbiol.*, 9(8), pp.2067-2078.
- 813 68. Klatt, C.G., Wood, J.M., Rusch, D.B., et al., 2011. Community ecology of hot spring  
814 cyanobacterial mats: predominant populations and their functional potential. *ISME J.*, 5(8),  
815 p.1262.
- 816 69. Klueglein, N. and Kappler, A., 2013. Abiotic oxidation of Fe (II) by reactive nitrogen species  
817 in cultures of the nitrate-reducing Fe (II) oxidizer *Acidovorax* sp. BoFeN1—questioning the  
818 existence of enzymatic Fe (II) oxidation. *Geobiology*, 11(2), pp.180-190.



- 819 70. Kublanov, I.V., Sigalova, O.M., Gavrillov, S.N., et al. 2017. Genomic analysis of *Caldithrix*  
820 *abyssi*, the thermophilic anaerobic bacterium of the novel bacterial phylum  
821 *Calditrichaeota*. *Front. Microbiol.*, 8, p.195.
- 822 71. Kulp, T.R., Hoefl, S.E., Asao, M., Madigan, M.T., Hollibaugh, J.T., Fisher, J.C., Stolz, J.F.,  
823 Culbertson, C.W., Miller, L.G. and Oremland, R.S., 2008. Arsenic (III) fuels anoxygenic  
824 photosynthesis in hot spring biofilms from Mono Lake, California. *Science*, 321(5891),  
825 pp.967-970.
- 826 72. Kuznetsov, B.B., Ivanovsky, R.N., Keppen, O.I., et al., 2011. Draft genome sequence of the  
827 anoxygenic filamentous phototrophic bacterium *Oscillochloris trichoides* subsp. DG-6. *J.*  
828 *Bacteriol.*, 193(1), pp.321-322.
- 829 73. Laslett, D. and Canback, B., 2004. ARAGORN, a program to detect tRNA genes and  
830 tmRNA genes in nucleotide sequences. *Nucleic Acids Res.*, 32(1), pp.11-16.
- 831 74. Lemoine, F., Entfellner, J.B.D., Wilkinson, E., Correia, D., Felipe, M.D., Oliveira, T. and  
832 Gascuel, O., 2018. Renewing Felsenstein's phylogenetic bootstrap in the era of big  
833 data. *Nature*, 556(7702), p.452.
- 834 75. Letunic, I. and Bork, P., 2016. Interactive tree of life (iTOL) v3: an online tool for the  
835 display and annotation of phylogenetic and other trees. *Nucleic Acids Res.*, 44(W1),  
836 pp.W242-W245.
- 837 76. Li, H., Handsaker, B., Wysoker, A., Fennell, T., Ruan, J., Homer, N., Marth, G., Abecasis, G.  
838 and Durbin, R., 2009. The sequence alignment/map format and  
839 SAMtools. *Bioinformatics*, 25(16), pp.2078-2079.
- 840 77. Li, D., Liu, C.M., Luo, R., Sadakane, K. and Lam, T.W., 2015. MEGAHIT: an ultra-fast  
841 single-node solution for large and complex metagenomics assembly via succinct de Bruijn  
842 graph. *Bioinformatics*, 31(10), pp.1674-1676.
- 843 78. Li, G., Rabe, K.S., Nielsen, J. and Engqvist, M.K., 2019. Machine learning applied to  
844 predicting microorganism growth temperatures and enzyme catalytic optima. *BioRxiv*,  
845 p.522342.
- 846 79. Lyons, T.W., Reinhard, C.T. and Planavsky, N.J., 2014. The rise of oxygen in Earth's early  
847 ocean and atmosphere. *Nature*, 506(7488), p.307.
- 848 80. Makita, H., Tanaka, E., Mitsunobu, S., Miyazaki, M., Nunoura, T., Uematsu, K., Takaki, Y.,  
849 Nishi, S., Shimamura, S. and Takai, K., 2017. *Mariprofundus micogutta* sp. nov., a novel  
850 iron-oxidizing zetaproteobacterium isolated from a deep-sea hydrothermal field at the  
851 Bayonnaise knoll of the Izu-Ogasawara arc, and a description of *Mariprofundales* ord. nov.  
852 and *Zetaproteobacteria* classis nov. *Arch. Microbiol.*, 199(2), pp.335-346.
- 853 81. Marshall, I.P., Starnawski, P., Cupit, C., Fernández Cáceres, E., Etema, T.J., Schramm, A.  
854 and Kjeldsen, K.U., 2017. The novel bacterial phylum *Calditrichaeota* is diverse, widespread  
855 and abundant in marine sediments and has the capacity to degrade detrital proteins. *Environ.*  
856 *Microbiol. Rep.* 9(4), pp.397-403.
- 857 82. Meyer-Dombard, D., Amend, J.P. and Osburn, M.R., 2013. Microbial diversity and potential  
858 for arsenic and iron biogeochemical cycling at an arsenic rich, shallow-sea hydrothermal vent  
859 (Tutum Bay, Papua New Guinea). *Chem. Geol.*, 348, pp.37-47.
- 860 83. Miller, M.A., Pfeiffer, W. and Schwartz, T., 2010, November. Creating the CIPRES Science  
861 Gateway for inference of large phylogenetic trees. In *Gateway Computing Environments*  
862 *Workshop (GCE), 2010* (pp. 1-8).
- 863 84. Miroshnichenko, M.L., Kostrikin, N.A., Chernykh, N.A., Pimenov, N.V., Tourova, T.P.,  
864 Antipov, A.N., Spring, S., Stackebrandt, E. and Bonch-Osmolovskaya, E.A., 2003. *Caldithrix*

- abyssi gen. nov., sp. nov., a nitrate-reducing, thermophilic, anaerobic bacterium isolated from a Mid-Atlantic Ridge hydrothermal vent, represents a novel bacterial lineage. *Int. J. Syst. Evol. Microbiol.*, 53(1), pp.323-329.
85. Mori, J.F., Scott, J.J., Hager, K.W., Moyer, C.L., Küsel, K. and Emerson, D., 2017. Physiological and ecological implications of an iron-or hydrogen-oxidizing member of the Zetaproteobacteria, *Ghiorsea bivora*, gen. nov., sp. nov. *ISME J*, 11(11), p.2624.
86. Oksanen, J., Blanchet, F.G., Friendly, M., et al., 2016. Vegan: community ecology package. R package version 2.3-5. R Foundation, Vienna, Austria.
87. Pace, L.A., Hemp, J., Ward, L.M. and Fischer, W.W., 2015. Draft genome of *Thermanaerothermophilus daxensis* GNS-1, a thermophilic facultative anaerobe from the Chloroflexi class Anaerolineae. *Genome Announcements*, 3(6), pp.e01354-15.
88. Parada, A.E., Needham, D.M. and Fuhrman, J.A., 2016. Every base matters: assessing small subunit rRNA primers for marine microbiomes with mock communities, time series and global field samples. *Environ. Microbiol.*, 18(5), pp.1403-1414.
89. Parks, D.H., Imelfort, M., Skennerton, C.T., Hugenholtz, P. and Tyson, G.W., 2015. CheckM: assessing the quality of microbial genomes recovered from isolates, single cells, and metagenomes. *Genome Res.*, pp.gr-186072.
90. Parks, D.H., Chuvochina, M., Waite, D.W., Rinke, C., Skarshewski, A., Chaumeil, P.A. and Hugenholtz, P., 2018. A standardized bacterial taxonomy based on genome phylogeny substantially revises the tree of life. *Nat. Biotechnol.*
91. Pierson, B.K., Parenteau, M.N. and Griffin, B.M., 1999. Phototrophs in high-iron-concentration microbial mats: physiological ecology of phototrophs in an iron-depositing hot spring. *Appl. Environ. Microbiol.*, 65(12), pp.5474-5483.
92. Poulton, S.W., Fralick, P.W. and Canfield, D.E., 2010. Spatial variability in oceanic redox structure 1.8 billion years ago. *Nat. Geosci.*, 3(7), p.486.
93. Price, M.N., Dehal, P.S. and Arkin, A.P., 2010. FastTree 2—approximately maximum-likelihood trees for large alignments. *PloS One*, 5(3), p.e9490.
94. Quast, C., Pruesse, E., Yilmaz, P., Gerken, J., Schweer, T., Yarza, P., Peplies, J. and Glöckner, F.O., 2012. The SILVA ribosomal RNA gene database project: improved data processing and web-based tools. *Nucleic Acids Res.*, 41(D1), pp.D590-D596.
95. R Core Team. 2014. R: A language and environment for statistical computing. R Foundation for Statistical Computing, Vienna, Austria
96. Roden, E., McBeth, J.M., Blothe, M., Percak-Dennett, E.M., Fleming, E.J., Holyoke, R.R., Luther III, G.W. and Emerson, D., 2012. The microbial ferrous wheel in a neutral pH groundwater seep. *Front. Microbiol.*, 3, p.172.
97. Rodriguez-R, L.M. and Konstantinidis, K.T., 2014. Bypassing cultivation to identify bacterial species. *Microbe*, 9(3), pp.111-118.
98. Roeselers, G., Norris, T.B., Castenholz, R.W., Rysgaard, S., Glud, R.N., Kühl, M. and Muyzer, G., 2007. Diversity of phototrophic bacteria in microbial mats from Arctic hot springs (Greenland). *Environ. Microbiol.*, 9(1), pp.26-38.
99. Sekiguchi, Y., Yamada, T., Hanada, S., Ohashi, A., Harada, H. and Kamagata, Y., 2003. *Anaerolinea thermophila* gen. nov., sp. nov. and *Caldilinea aerophila* gen. nov., sp. nov., novel filamentous thermophiles that represent a previously uncultured lineage of the domain Bacteria at the subphylum level. *Int. J. Syst. Evol. Microbiol.*, 53(6), pp.1843-1851.
100. Shannon, C., 1948. A Mathematical Theory of Communication-The Bell System Technical Journal, vol. 27, pag. 379-423, 623-656.

- 911 101. Shih, P.M., Hemp, J., Ward, L.M., Matzke, N.J. and Fischer, W.W., 2017. Crown group  
912 Oxyphotobacteria postdate the rise of oxygen. *Geobiology*, 15(1), pp.19-29.
- 913 102. Shih, P.M., Ward, L.M. and Fischer, W.W., 2017. Evolution of the 3-hydroxypropionate  
914 bicycle and recent transfer of anoxygenic photosynthesis into the Chloroflexi. *Proc. Natl.*  
915 *Acad. Sci.*, 114(40), pp.10749-10754.
- 916 103. Sieber, C.M., Probst, A.J., Sharrar, A., Thomas, B.C., Hess, M., Tringe, S.G. and  
917 Banfield, J.F., 2018. Recovery of genomes from metagenomes via a dereplication,  
918 aggregation and scoring strategy. *Nat. Microbiol.*, p.1.
- 919 104. Simpson, E.H. 1949. Measurement of diversity: *Nature*, v. 163, p. 688.
- 920 105. Singer, E., Emerson, D., Webb, E.A., et al., 2011. Mariprofundus ferrooxydans PV-1 the  
921 first genome of a marine Fe (II) oxidizing Zetaproteobacterium. *PloS One*, 6(9), p.e25386.
- 922 106. Sleep, N.H. and Bird, D.K., 2007. Niches of the pre - photosynthetic biosphere and  
923 geologic preservation of Earth's earliest ecology. *Geobiology*, 5(2), pp.101-117.
- 924 107. Søndergaard, D., Pedersen, C.N. and Greening, C., 2016. HydDB: a web tool for  
925 hydrogenase classification and analysis. *Sci. Rep.*, 6, p.34212.
- 926 108. Sorokin, D.Y., Lücker, S., Vejmekova, D., et al., 2012. Nitrification expanded:  
927 discovery, physiology and genomics of a nitrite-oxidizing bacterium from the phylum  
928 Chloroflexi. *ISME J*, 6(12), p.2245.
- 929 109. Spear, J.R., Walker, J.J., McCollom, T.M. and Pace, N.R., 2005. Hydrogen and  
930 bioenergetics in the Yellowstone geothermal ecosystem. *Proc. Natl. Acad. Sci.*, 102(7),  
931 pp.2555-2560.
- 932 110. Stamatakis, A., 2014. RAxML version 8: a tool for phylogenetic analysis and post-  
933 analysis of large phylogenies. *Bioinformatics*, 30(9), pp.1312-1313.
- 934 111. Stamenković, V., Ward, L.M., Mischna, M. and Fischer, W.W., 2018. O<sub>2</sub> solubility in  
935 Martian near-surface environments and implications for aerobic life. *Nat. Geosci.*, p.1.
- 936 112. Stamenković, V., Beegle, L.W., Zacny, K., et al., 2019. The next frontier for planetary  
937 and human exploration. *Nature Astronomy*, p.1.
- 938 113. Stein, L.Y. and Klotz, M.G., 2016. The nitrogen cycle. *Curr. Biol.*, 26(3), pp.R94-R98.
- 939 114. Stookey, L.L., 1970. Ferrozine---a new spectrophotometric reagent for iron. *Anal.*  
940 *Chem.*, 42(7), pp.779-781.
- 941 115. Strous, M., Fuerst, J.A., Kramer, E.H., Logemann, S., Muyzer, G., van de Pas-Schoonen,  
942 K.T., Webb, R., Kuenen, J.G. and Jetten, M.S., 1999. Missing lithotroph identified as new  
943 planctomycete. *Nature*, 400(6743), p.446.
- 944 116. Suda, K., Gilbert, A., Yamada, K., Yoshida, N. and Ueno, Y., 2017. Compound- and  
945 position-specific carbon isotopic signatures of abiogenic hydrocarbons from on-land  
946 serpentinite-hosted Hakuba Happo hot spring in Japan. *Geochim. Cosmochim. Acta*, 206,  
947 pp.201-215.
- 948 117. Swanner, E.D., Mloszewska, A.M., Cirpka, O.A., Schoenberg, R., Konhauser, K.O. and  
949 Kappler, A., 2015. Modulation of oxygen production in Archaean oceans by episodes of Fe  
950 (II) toxicity. *Nat. Geosci.*, 8(2), pp.126-130.
- 951 118. Takai, K. and Nakagawa, S., 2014. The Family Hydrogenothermaceae. In *The*  
952 *Prokaryotes* (pp. 689-699). Springer, Berlin, Heidelberg.
- 953 119. Tank, M., Thiel, V., Ward, D.M. and Bryant, D.A., 2017. A panoply of phototrophs: an  
954 overview of the thermophilic chlorophototrophs of the microbial mats of alkaline siliceous  
955 hot springs in Yellowstone National Park, WY, USA. In *Modern topics in the phototrophic*  
956 *prokaryotes* (pp. 87-137). Springer, Cham.

- 957 120. Thiel, V., Hügler, M., Ward, D.M. and Bryant, D.A., 2017. The dark side of the  
958 mushroom spring microbial mat: life in the shadow of chlorophototrophs. II. Metabolic  
959 functions of abundant community members predicted from metagenomic analyses. *Front.*  
960 *Microbiol.*, 8, p.943.
- 961 121. Thiel, V., Tank, M. and Bryant, D.A., 2018. Diversity of chlorophototrophic bacteria  
962 revealed in the omics era. *Annu. Rev. Plant Biol.*, 69, pp.21-49.
- 963 122. Trembath-Reichert, E., Ward, L.M., Slotznick, S.P., Bachtel, S.L., Kerans, C.,  
964 Grotzinger, J.P. and Fischer, W.W., 2016. Gene Sequencing-Based Analysis of Microbial-  
965 Mat Morphotypes, Caicos Platform, British West Indies. *J. Sediment. Res.*, 86(6),  
966 pp.629-636.
- 967 123. Trouwborst, R.E., Johnston, A., Koch, G., Luther III, G.W. and Pierson, B.K., 2007.  
968 Biogeochemistry of Fe (II) oxidation in a photosynthetic microbial mat: implications for  
969 Precambrian Fe (II) oxidation. *Geochim. Cosmochim. Acta*, 71(19), pp.4629-4643.
- 970 124. Walker, J.C. and Brimblecombe, P., 1985. Iron and sulfur in the pre-biologic  
971 ocean. *Precambrian Res.*, 28(3-4), pp.205-222.
- 972 125. Wang, Q., Garrity, G.M., Tiedje, J.M. and Cole, J.R., 2007. Naive Bayesian classifier for  
973 rapid assignment of rRNA sequences into the new bacterial taxonomy. *Appl. Environ.*  
974 *Microbiol.*, 73(16), pp.5261-5267.
- 975 126. Ward, L.M., Hemp, J., Pace, L.A. and Fischer, W.W., 2015. Draft genome sequence of  
976 *Herpetosiphon geysericola* GC-42, a nonphototrophic member of the Chloroflexi class  
977 Chloroflexia. *Genome Announcements*, 3(6), pp.e01352-15.
- 978 127. Ward, L.M., Hemp, J., Pace, L.A. and Fischer, W.W., 2015. Draft genome sequence of  
979 *Leptolinea tardivitalis* YMTK-2, a mesophilic anaerobe from the Chloroflexi class  
980 Anaerolineae. *Genome Announcements*, 3(6), pp.e01356-15.
- 981 128. Ward, L.M., Kirschvink, J.L. and Fischer, W.W., 2016. Timescales of oxygenation  
982 following the evolution of oxygenic photosynthesis. *Origins Life Evol. Biospheres*, 46(1),  
983 pp.51-65.
- 984 129. Ward, L.M., McGlynn, S.E. and Fischer, W.W., 2017. Draft Genome Sequences of a  
985 Novel Lineage of Armatimonadetes Recovered from Japanese Hot Springs. *Genome*  
986 *Announcements*, 5(40), pp.e00820-17.
- 987 130. Ward, L.M., Idei, A., Terajima, S., Kakegawa, T., Fischer, W.W. and McGlynn, S.E.,  
988 2017. Microbial diversity and iron oxidation at Okuoku - hachikurou Onsen, a Japanese hot  
989 spring analog of Precambrian iron formations. *Geobiology*, 15(6), pp.817-835.
- 990 131. Ward, L.M., Hemp, J., Shih, P.M., McGlynn, S.E. and Fischer, W.W., 2018. Evolution of  
991 phototrophy in the Chloroflexi phylum driven by horizontal gene transfer. *Front.*  
992 *Microbiol.*, 9, p.260.
- 993 132. Ward, L.M., McGlynn, S.E. and Fischer, W.W., 2018. Draft Genome Sequence of a  
994 Divergent Anaerobic Member of the Chloroflexi Class Ardentcatenia from a Sulfidic Hot  
995 Spring. *Genome Announcements*, 6(25), pp.e00571-18.
- 996 133. Ward, L.M., McGlynn, S.E. and Fischer, W.W., 2018. Draft Genome Sequences of Two  
997 Basal Members of the Anaerolineae Class of Chloroflexi from a Sulfidic Hot  
998 Spring. *Genome Announcements*, 6(25), pp.e00570-18.
- 999 134. Ward, L.M., Shih, P.M., and Fischer, W.W., 2018. MetaPOAP: Presence or Absence of  
1000 Metabolic Pathways in Metagenome-Assembled Genomes. *Bioinformatics*, bty510.



- 1001 135. Ward, L.M., Rasmussen, B. and Fischer, W.W., 2019. Primary productivity was limited  
1002 by electron donors prior to the advent of oxygenic photosynthesis. *J. Geophys. Res.:  
1003 Biogeosci.*, 124(2), pp.211-226.
- 1004 136. Ward, LM, V Stamenković, K Hand, and WW Fischer. 2019. Follow the Oxygen:  
1005 Comparative Histories of Planetary Oxygenation and Opportunities for Aerobic Life.  
1006 *Astrobiology*, in press.
- 1007 137. Ward, L.M. and Shih, P.M., 2019. The evolution and productivity of carbon fixation  
1008 pathways in response to changes in oxygen concentration over geological time. *Free  
1009 Radical Biol. Med.*
- 1010 138. Waterhouse, A.M., Procter, J.B., Martin, D.M., Clamp, M. and Barton, G.J., 2009.  
1011 Jalview Version 2—a multiple sequence alignment editor and analysis  
1012 workbench. *Bioinformatics*, 25(9), pp.1189-1191.
- 1013 139. Wickham, H., 2010. ggplot2: elegant graphics for data analysis. *J. Stat. Softw.*, 35(1),  
1014 pp.65-88.
- 1015 140. Wu, Y.W., Tang, Y.H., Tringe, S.G., Simmons, B.A. and Singer, S.W., 2014. MaxBin:  
1016 an automated binning method to recover individual genomes from metagenomes using an  
1017 expectation-maximization algorithm. *Microbiome*, 2(1), p.26.
- 1018 141. Yamada, T. and Sekiguchi, Y., 2009. Cultivation of uncultured chloroflexi subphyla:  
1019 significance and ecophysiology of formerly uncultured Chloroflexi 'subphylum i' with natural  
1020 and biotechnological relevance. *Microbes Environ.*, 24(3), pp.205-216.

1021

1022 **Table 1:** Geochemistry of source water at Jinata Onsen.

|                                                  |         |
|--------------------------------------------------|---------|
| <b>T</b>                                         | 63°C    |
| <b>pH</b>                                        | 5.4     |
| <b>DO</b>                                        | 4.7 μM  |
| <b>Fe<sup>2+</sup></b>                           | 261 μM  |
| <b>NH<sub>3</sub>/NH<sub>4</sub><sup>+</sup></b> | 87 μM   |
| <b>Cl<sup>-</sup></b>                            | 654 mM  |
| <b>SO<sub>4</sub><sup>2-</sup></b>               | 17 mM   |
| <b>NO<sub>3</sub><sup>-</sup></b>                | <1.6 μM |
| <b>NO<sub>2</sub><sup>-</sup></b>                | <2.2 μM |
| <b>HPO<sub>4</sub><sup>-</sup></b>               | <1 μM   |

1023

1024 **Figure 1:**

1025 Location of Jinata Onsen on Shikinejima Island, Japan, and inset overview sketch of field site  
1026 with sampling localities marked.

1027

1028 **Figure 2:**

1029 Representative photos of Jinata. A) Panorama of field site, with Source Pool on the left (Pool 1  
1030 below), Pool 2 and 3 in the center, and Out Flow to the bay on the right. B) Undistorted view  
1031 north up the canyon. C) Undistorted view south toward the bay, overlooking Pool 2. D) Source  
1032 Pool, coated in flocculent iron oxides and bubbling with gas mixture containing CO<sub>2</sub>, CH<sub>4</sub> and trace,  
1033 potentially variable, H<sub>2</sub>. E) Pool 2, with mixture of red iron oxides and green from  
1034 Cyanobacteria-rich microbial mats. F) Close up of textured microbial mats in Pool 3. G) Close



1035 up of Out Flow, where hot spring water mixes with ocean water. Reprinted with permission from  
1036 (131).

1037

1038 **Figure 3:**

1039 Summary of geochemical and microbiological trends along the flow path of Jinata Onsen. Top:  
1040 panoramic view of Jinata Onsen, with Source Pool at left and flow of spring water toward the  
1041 bay at right, with sampling locations indicated. Middle: geochemical transect across the spring,  
1042 showing temperature ( $^{\circ}\text{C}$ , left axis) and dissolved Fe(II) and  $\text{O}_2$  ( $\mu\text{M}$ , right axis). Bottom:  
1043 stacked bar chart of relative community abundance of dominant microbial phyla as determined  
1044 by 16S rRNA amplicon sequencing. Sequence data were binned at the phylum level and  
1045 duplicate samples at each site were averaged. Reads that could not be assigned to a phylum were  
1046 discarded; all phyla that do not make up more than 2% of the community at any one site have  
1047 been collapsed to “Other”. Near the source, the community is predominantly made up of iron-  
1048 and/or hydrogen-oxidizing organisms in the Proteobacteria and Aquificae phyla. As the hot  
1049 spring water flows downstream, it equilibrates with the atmosphere and eventually mixes with  
1050 seawater, resulting in downstream cooling, accumulation of oxygen, and loss of dissolved iron  
1051 due to biological and abiotic processes. Oxygenic Cyanobacteria become progressively more  
1052 abundant downstream Hydrogen- and iron-oxidizing lithotrophs dominate near the source, but  
1053 phototrophic Cyanobacteria come to dominate downstream. Additional community diversity is  
1054 found in Supplemental Table 4.

1055

1056 **Figure 4:**

1057 Phylogeny of Bacteria and Archaea based on concatenated ribosomal proteins. Numbers in  
1058 parentheses next to phylum labels refer to number of MAGs recovered from Jinata Onsen.  
1059 Labels for phyla with two or fewer MAGs recovered from Jinata omitted for clarity. The  
1060 reference alignment was modified from Hug et al. (50). Full list of MAGs recovered available in  
1061 Supplemental Table 6.

1062

1063 **Figure 5:** Phylogeny of the Zetaproteobacteria, rooted with Alphaproteobacteria, built with  
1064 concatenated ribosomal protein sequences. Data from (80), (85), (105), and other draft genomes  
1065 available on Genbank. All nodes recovered TBE support values greater than 0.7. In cases where  
1066 reference genomes have a unique strain name or identifier, this is included; otherwise Genbank  
1067 WGS genome prefixes are used.

1068

1069 **Figure 6:** Phylogeny of the Calditrichaeota, rooted with Bacteroidetes, built with concatenated  
1070 ribosomal protein sequences. Data from (70) and other draft genomes available on genomes have  
1071 a unique strain name or identifier, this is included; otherwise Genbank WGS genome prefixes are  
1072 used.

1073

1074 **Figure 7:** Detailed phylogeny of the Chloroflexi phylum, with class-level clades highlighted in  
1075 gray, built with concatenated ribosomal protein sequences. The large basal class  
1076 Dehalococcoidia, which was not observed in 16S rRNA or metagenome data from Jinata, is  
1077 omitted for clarity. The phylogeny contains MAGs reported here, members of the Chloroflexi  
1078 phylum previously described (18, 22, 40, 43, 45, 46, 47, 64, 72, 87, 108, 126, 127, 131, 132,  
1079 133), and members of the closely related phylum Armatimonadetes as an outgroup (23, 129).

1080 MAGs described here are highlighted in green, MAGs previously reported from Jinata Onsen  
 1081 highlighted in pink. All nodes recovered TBE support values greater than 0.7. In cases where  
 1082 reference genomes have a unique strain name or identifier, this is included; otherwise Genbank  
 1083 WGS genome prefixes are used.  
 1084  
 1085  
 1086  
 1087

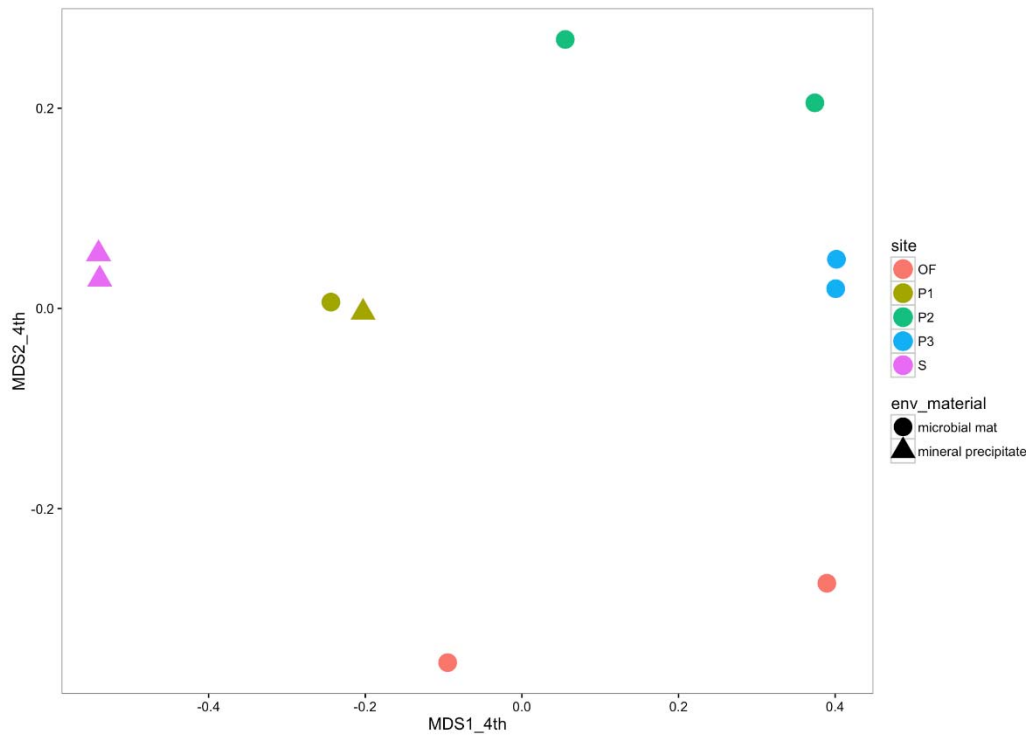

1088  
 1089 **Supplemental Figure 1:**  
 1090 Multidimensional scaling plot of Jinata samples. Each point represents the recovered microbial  
 1091 community from a given sample, with sites identified by color and sample type by shape.  
 1092 Samples plotting close to each other are relatively more similar in community composition.  
 1093 Abundance data are transformed by the 4<sup>th</sup> root to down-weight the effect of abundant taxa.  
 1094 Stress value is 0.0658.  
 1095

1096 **Supplemental Figure 2:**  
 1097 Microscopy images of sediment (Source Pool and Pool 1) or mat (Pool 2, Pool 3, and Out Flow).  
 1098 Left are light microscopy images. Center and right are fluorescence images. At center, blue  
 1099 signal is DAPI-stained (Excitation: 365nm, Emission: BP445~50nm). At right, red is  
 1100 autofluorescence signal of Cyanobacteria (BP395~440nm, LP470nm). Scale bars 50  $\mu$ m.  
 1101

1102 **Supplemental Table 1:** Geochemistry and brief description at sampling sites along the flow path  
 1103 of Jinata Onsen as discussed in the text.

|  | pH | T<br>(°C) | Fe(II)<br>( $\mu$ M) | DO<br>( $\mu$ M) | DIC (mM) | DOC (mM) | Descriptions |
|--|----|-----------|----------------------|------------------|----------|----------|--------------|
|--|----|-----------|----------------------|------------------|----------|----------|--------------|

|                    |            |                |            |                                      |                     |                     |                                                                                                                                |
|--------------------|------------|----------------|------------|--------------------------------------|---------------------|---------------------|--------------------------------------------------------------------------------------------------------------------------------|
| <b>Source Pool</b> | <b>5.4</b> | <b>60-63</b>   | <b>260</b> | <b>4.7 (source)<br/>39 (surface)</b> | <b>Not measured</b> | <b>Not measured</b> | <b>Fluffy red iron oxide precipitate</b>                                                                                       |
| <b>Pool 1</b>      | <b>5.8</b> | <b>59-59.5</b> | <b>265</b> | <b>58</b>                            | <b>5.51 ± 0.28</b>  | <b>1.31 ± 0.18</b>  | <b>Reddish precipitate and streamers in shallower regions, more yellowish deeper</b>                                           |
| <b>Pool 2</b>      | <b>6.5</b> | <b>44.5-54</b> | <b>151</b> | <b>134</b>                           | <b>2.09 ± 0.11</b>  | <b>0.76 ± 0.10</b>  | <b>Iron oxide-coated microbial mats. Orange to orange-green.</b>                                                               |
| <b>Pool 3</b>      | <b>6.7</b> | <b>37.3-46</b> | <b>100</b> | <b>175</b>                           | <b>1.79 ± 0.09</b>  | <b>0.70 ± 0.10</b>  | <b>Green or mottled orange-green microbial mats, commonly with 1-5cm finger-like morphology.</b>                               |
| <b>Outflow</b>     | <b>6.5</b> | <b>27-32</b>   | <b>45</b>  | <b>234</b>                           | <b>Not measured</b> | <b>Not measured</b> | <b>Ocean water within mixing zone at high tide, with constant flow of spring water from Pool 2. Thin green microbial mats.</b> |

1104

1105

1106

**Supplemental Table 2:** Gas composition of bubbles collected from the Source Pool at Jinata Onsen.

| Sampling dates (mm/dd/yyyy) | Measurement number | Average of gas compositions (percent composition) |     |                |      |                 |      |                 |     |
|-----------------------------|--------------------|---------------------------------------------------|-----|----------------|------|-----------------|------|-----------------|-----|
|                             |                    | N <sub>2</sub>                                    | SE  | O <sub>2</sub> | SE   | CH <sub>4</sub> | SE   | CO <sub>2</sub> | SE  |
| 10/03/2017                  | 2                  | 30.5                                              | 4.6 | 0.10           | 0.01 | 0.04            | 0.01 | 69.3            | 4.6 |
| 04/13/2018                  | 4                  | 55.5                                              | 5.5 | 0.07           | 0.04 | 0.05            | 0.01 | 44.4            | 5.0 |

1107  
1108  
1109  
1110

**Supplemental Table 3:**

Diversity metrics of Jinata sequencing. Diversity metrics calculated for both 99% and 97% sequence identity cutoffs for assigning OTUs.

| Sample:              | Reads: | OTUs (99%): | Good Coverage (99%): | Shannon Index (99%): | Inverse Simpson (99%): | OTUs (97%): | Goods Coverage (97%): | Shannon Index (97%): | Inverse Simpson (97%): |
|----------------------|--------|-------------|----------------------|----------------------|------------------------|-------------|-----------------------|----------------------|------------------------|
| <b>Source Pool A</b> | 48680  | 18832       | 0.665                | 10.443               | 35.146                 | 6951        | 0.907                 | 7.996                | 17.361                 |
| <b>Source Pool B</b> | 18235  | 7772        | 0.646                | 10.388               | 68.018                 | 4139        | 0.844                 | 8.651                | 31.822                 |
| <b>Pool 1 A</b>      | 96268  | 25305       | 0.788                | 10.172               | 53.546                 | 11734       | 0.920                 | 8.403                | 28.691                 |
| <b>Pool 1 B</b>      | 56672  | 13835       | 0.797                | 8.813                | 26.975                 | 5598        | 0.933                 | 6.818                | 13.827                 |
| <b>Pool 2 A</b>      | 35690  | 12489       | 0.713                | 9.625                | 22.248                 | 7352        | 0.855                 | 8.271                | 16.600                 |
| <b>Pool 2 B</b>      | 4454   | 2274        | 0.560                | 9.066                | 49.599                 | 1729        | 0.689                 | 8.104                | 27.390                 |
| <b>Pool 3 A</b>      | 28273  | 11334       | 0.665                | 10.046               | 35.705                 | 6766        | 0.824                 | 8.403                | 20.034                 |
| <b>Pool 3 B</b>      | 2076   | 1166        | 0.522                | 8.832                | 75.900                 | 786         | 0.699                 | 7.489                | 35.312                 |
| <b>Outflow A</b>     | 31980  | 18486       | 0.497                | 11.989               | 64.318                 | 11994       | 0.712                 | 10.538               | 34.881                 |
| <b>Outflow B</b>     | 32465  | 10896       | 0.713                | 9.281                | 25.691                 | 5918        | 0.857                 | 7.133                | 11.585                 |

1111  
1112  
1113  
1114  
1115  
1116  
1117  
1118  
1119  
1120  
1121  
1122  
1123  
1124  
1125  
1126

**Supplemental Table 4:**

16S rRNA data as OTU table with sequences.

**Supplemental Table 5:**

16S rRNA data as relative abundance binned at the class level.

**Supplemental Table 6:**

High- and medium-quality metagenome-assembled genomes (MAGs) (>50% completeness and <10% contamination) recovered from Jinata Onsen. Predicted taxonomy based on placement in reference phylogeny as presented in Figure 4 and by GTDB-Tk (90). Optimal growth temperatures predicted following methods from (78).

**Supplemental Table 7:**

Presence of genes involved in aerobic respiration, hydrogen- and iron-oxidation, and carbon fixation in MAGs discussed in the text.

# Ward Figure 1

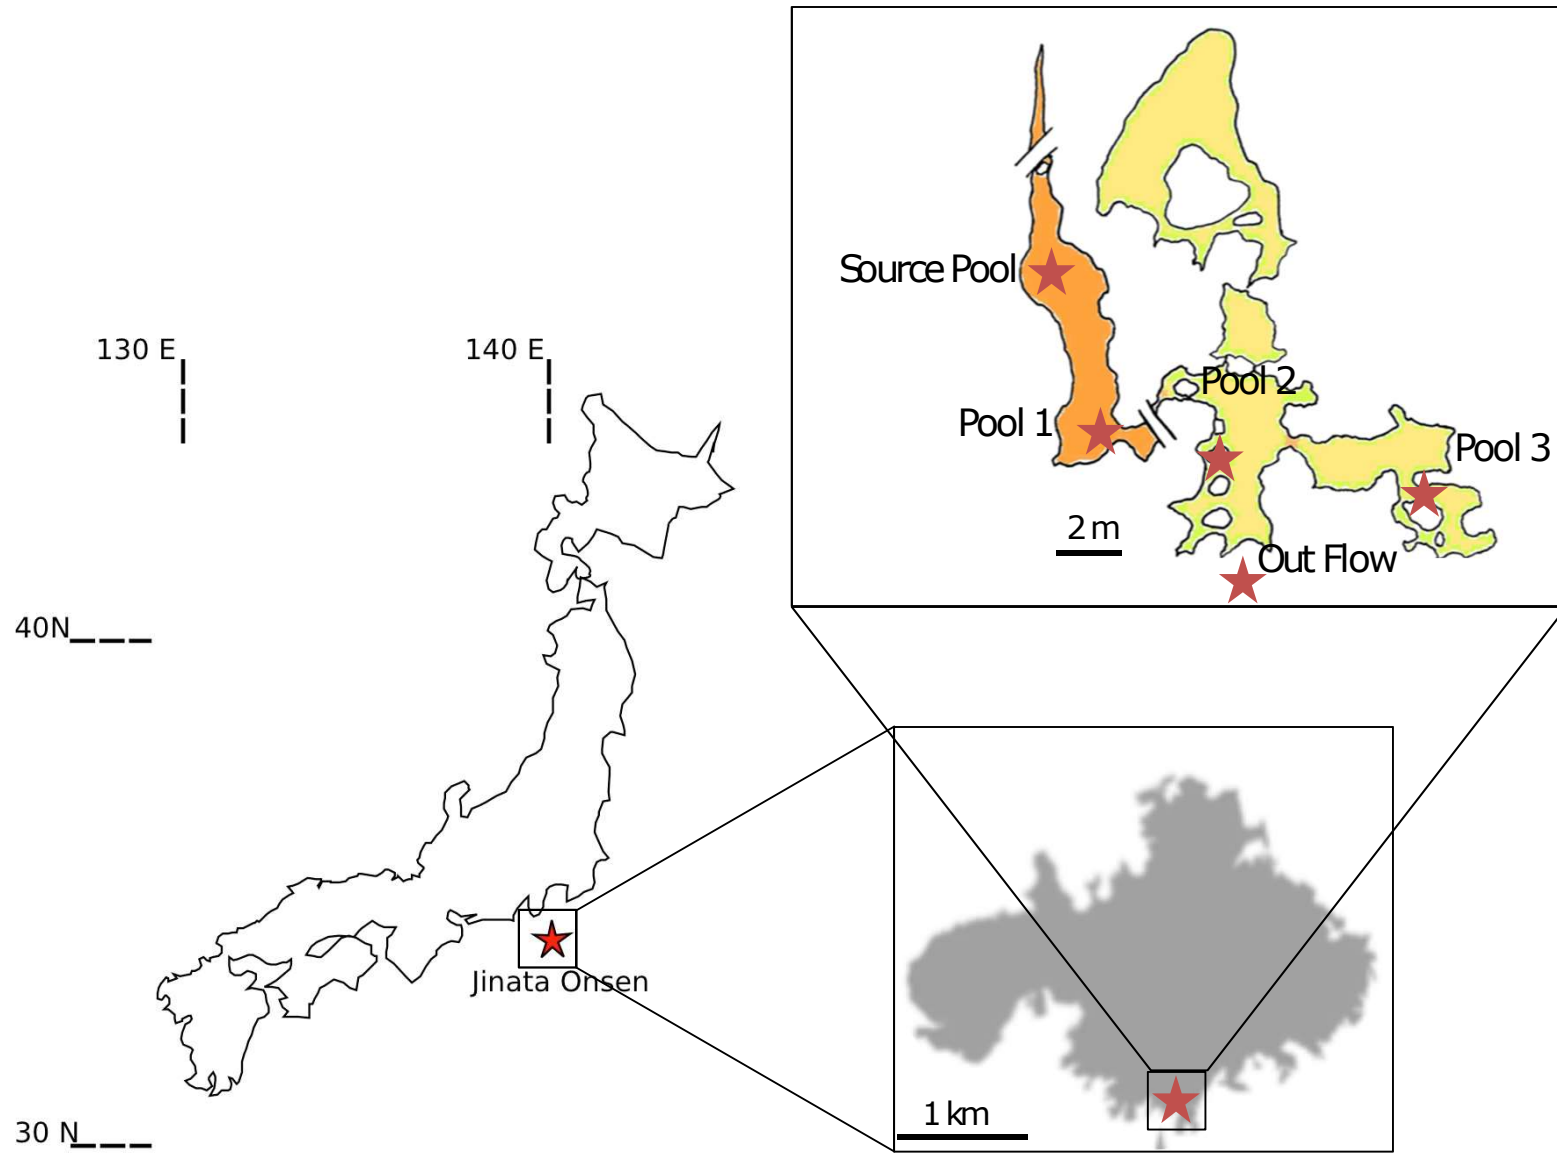



Ward Figure 2

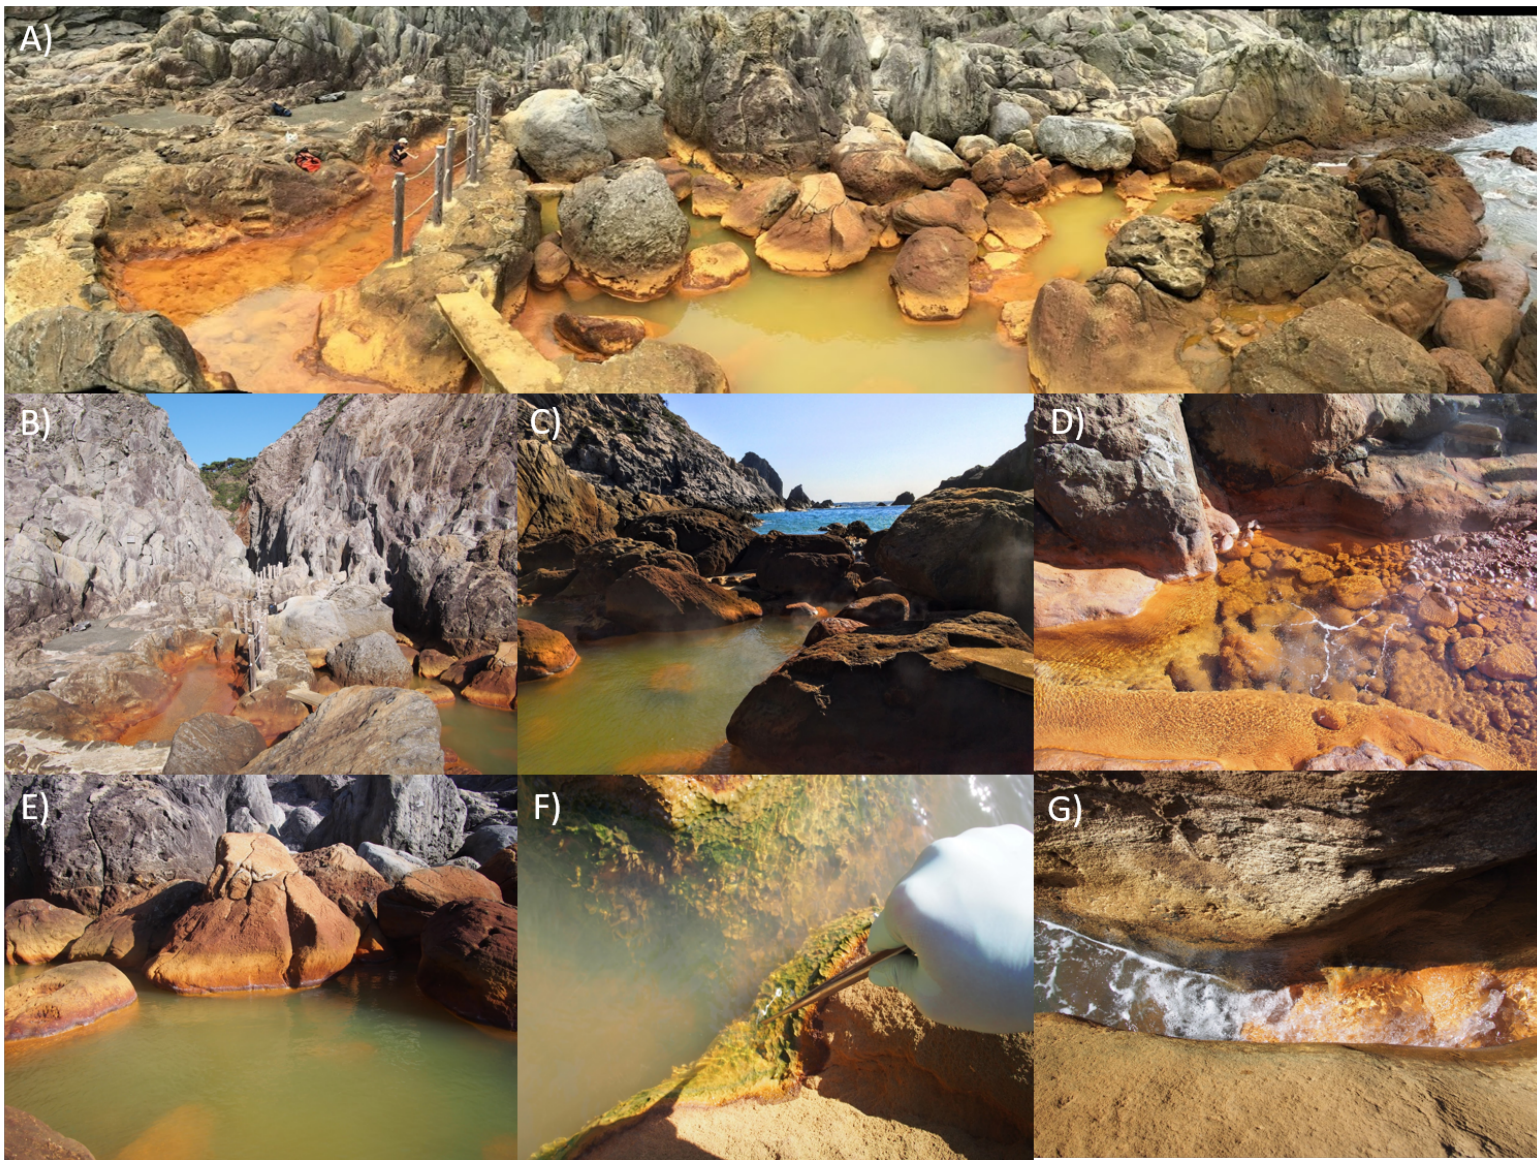





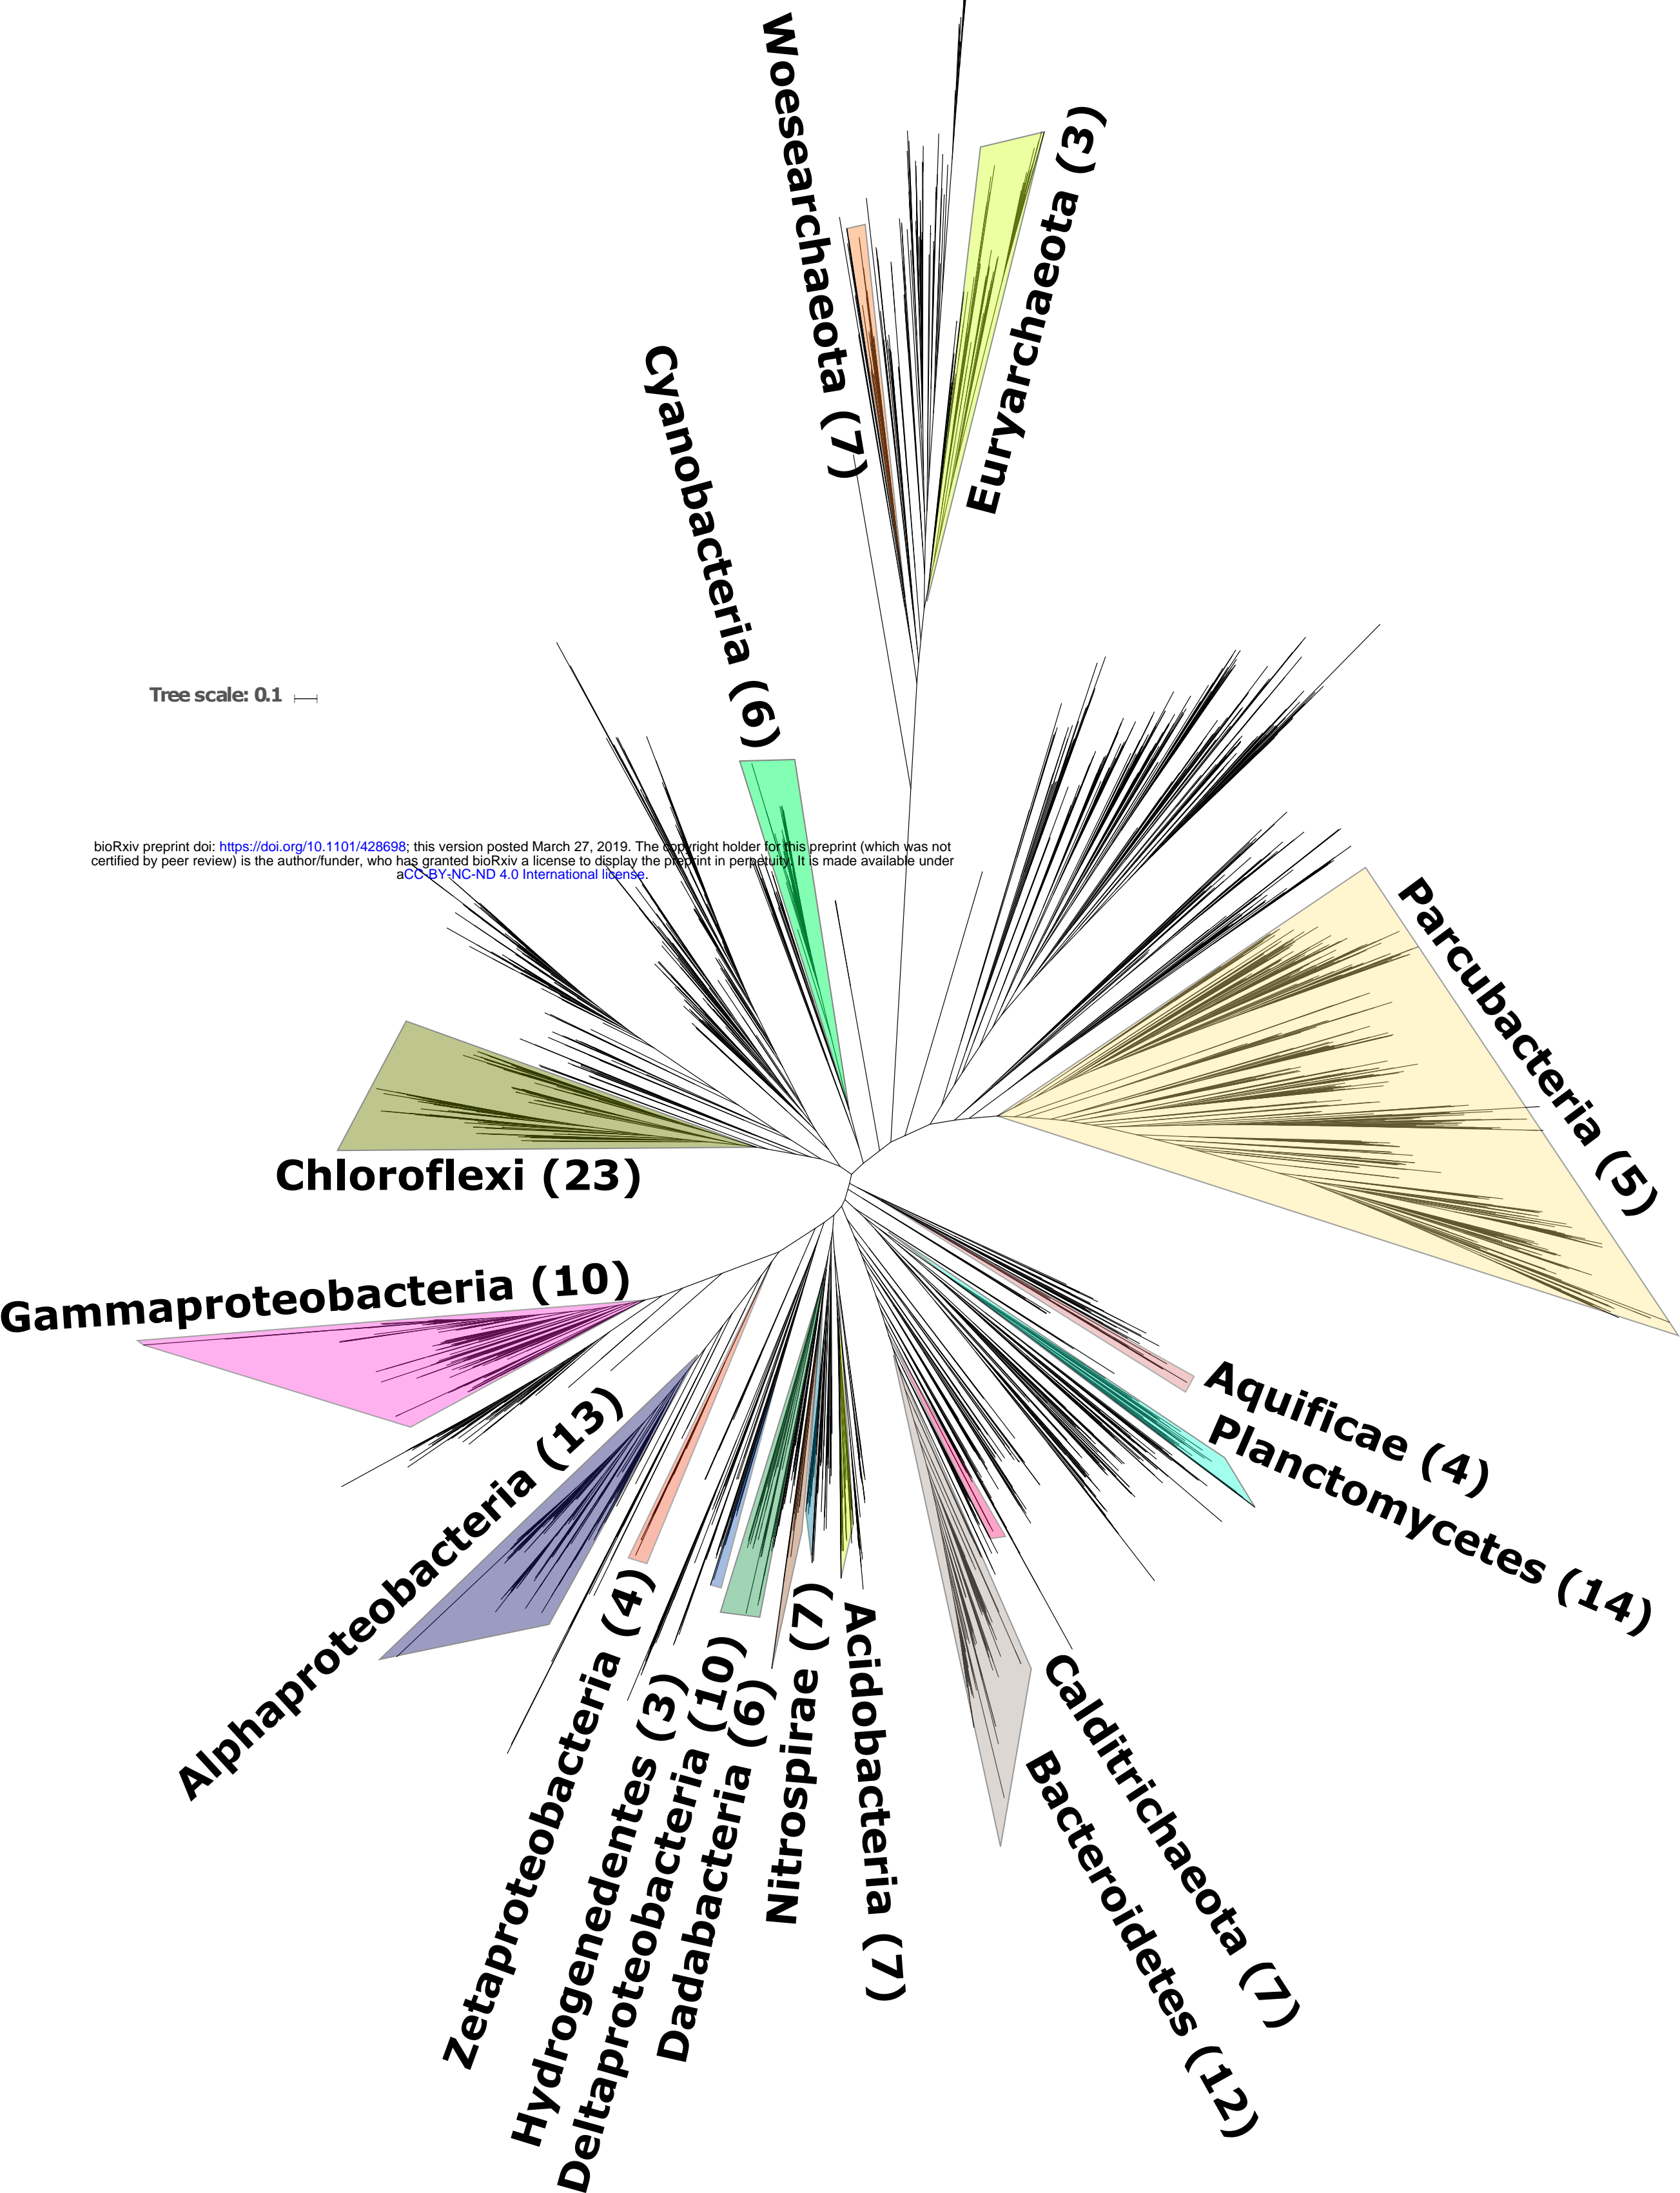

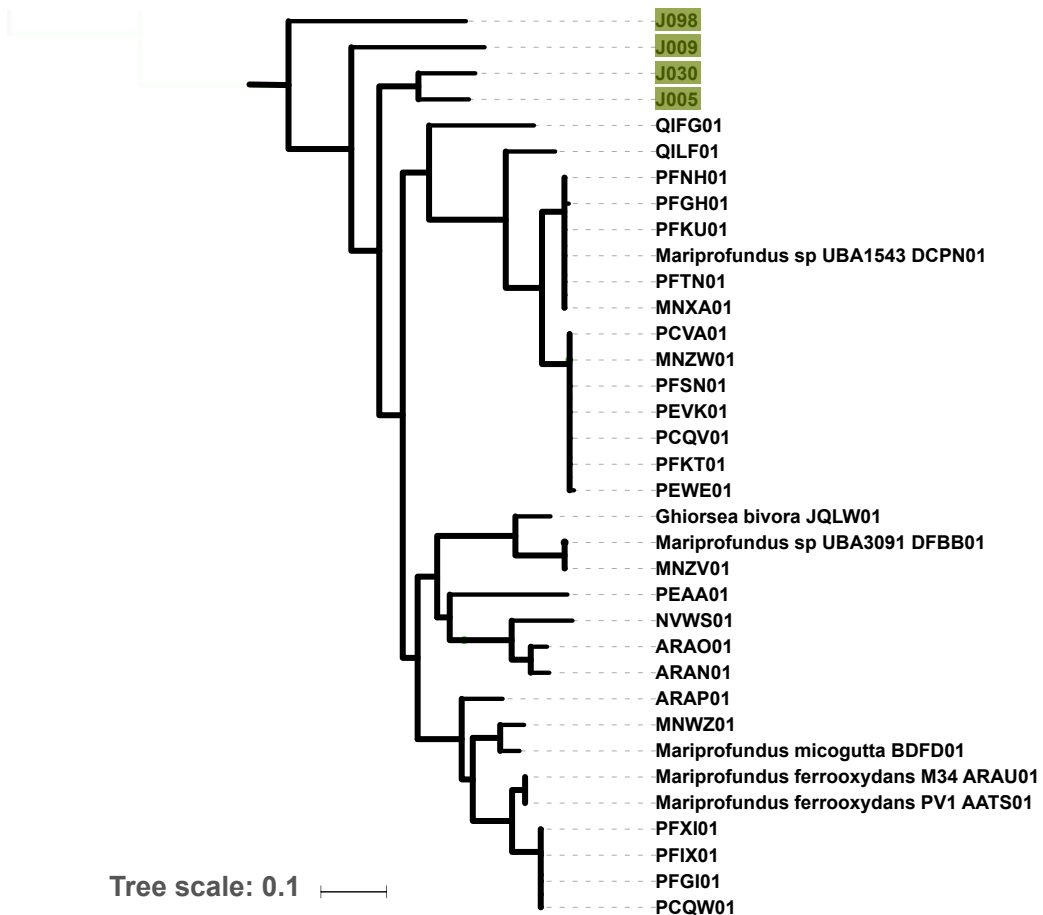

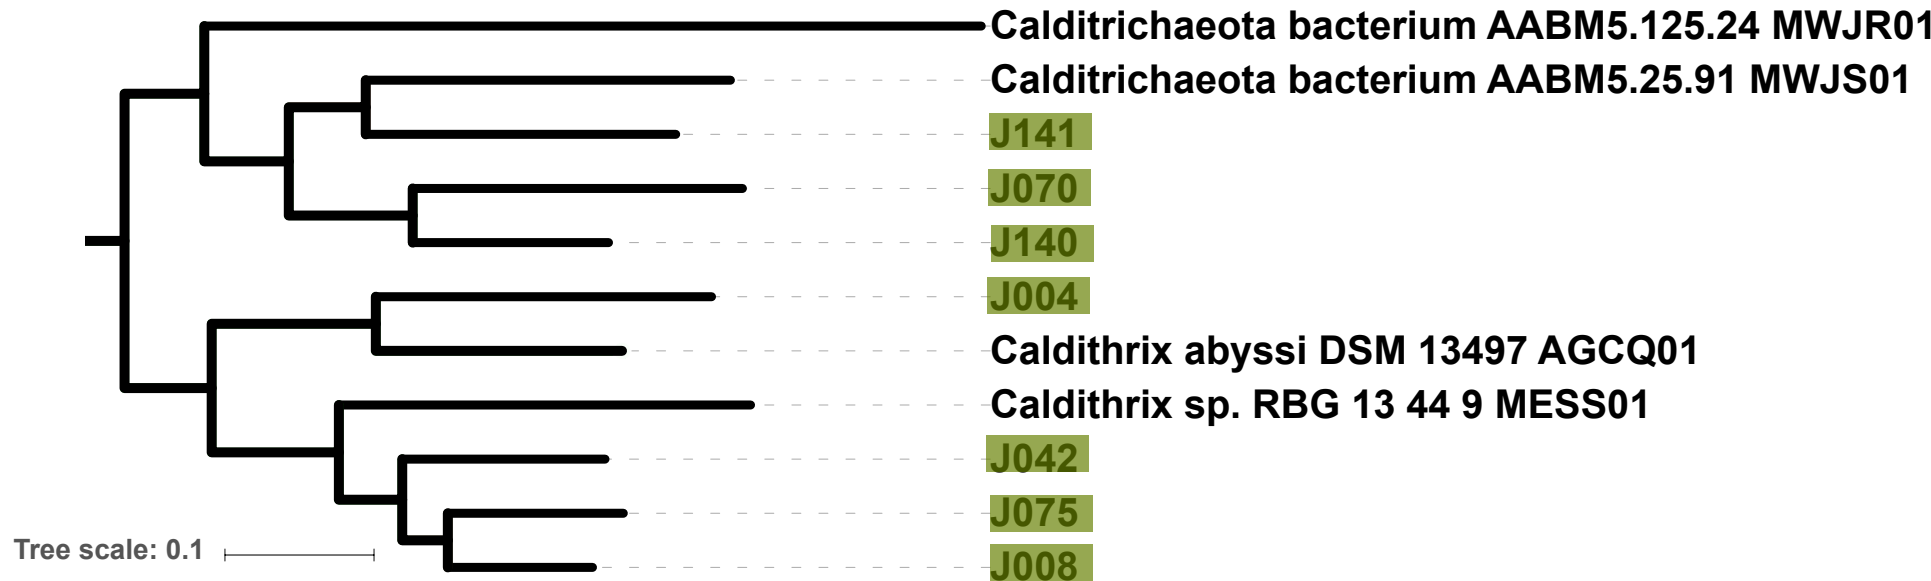



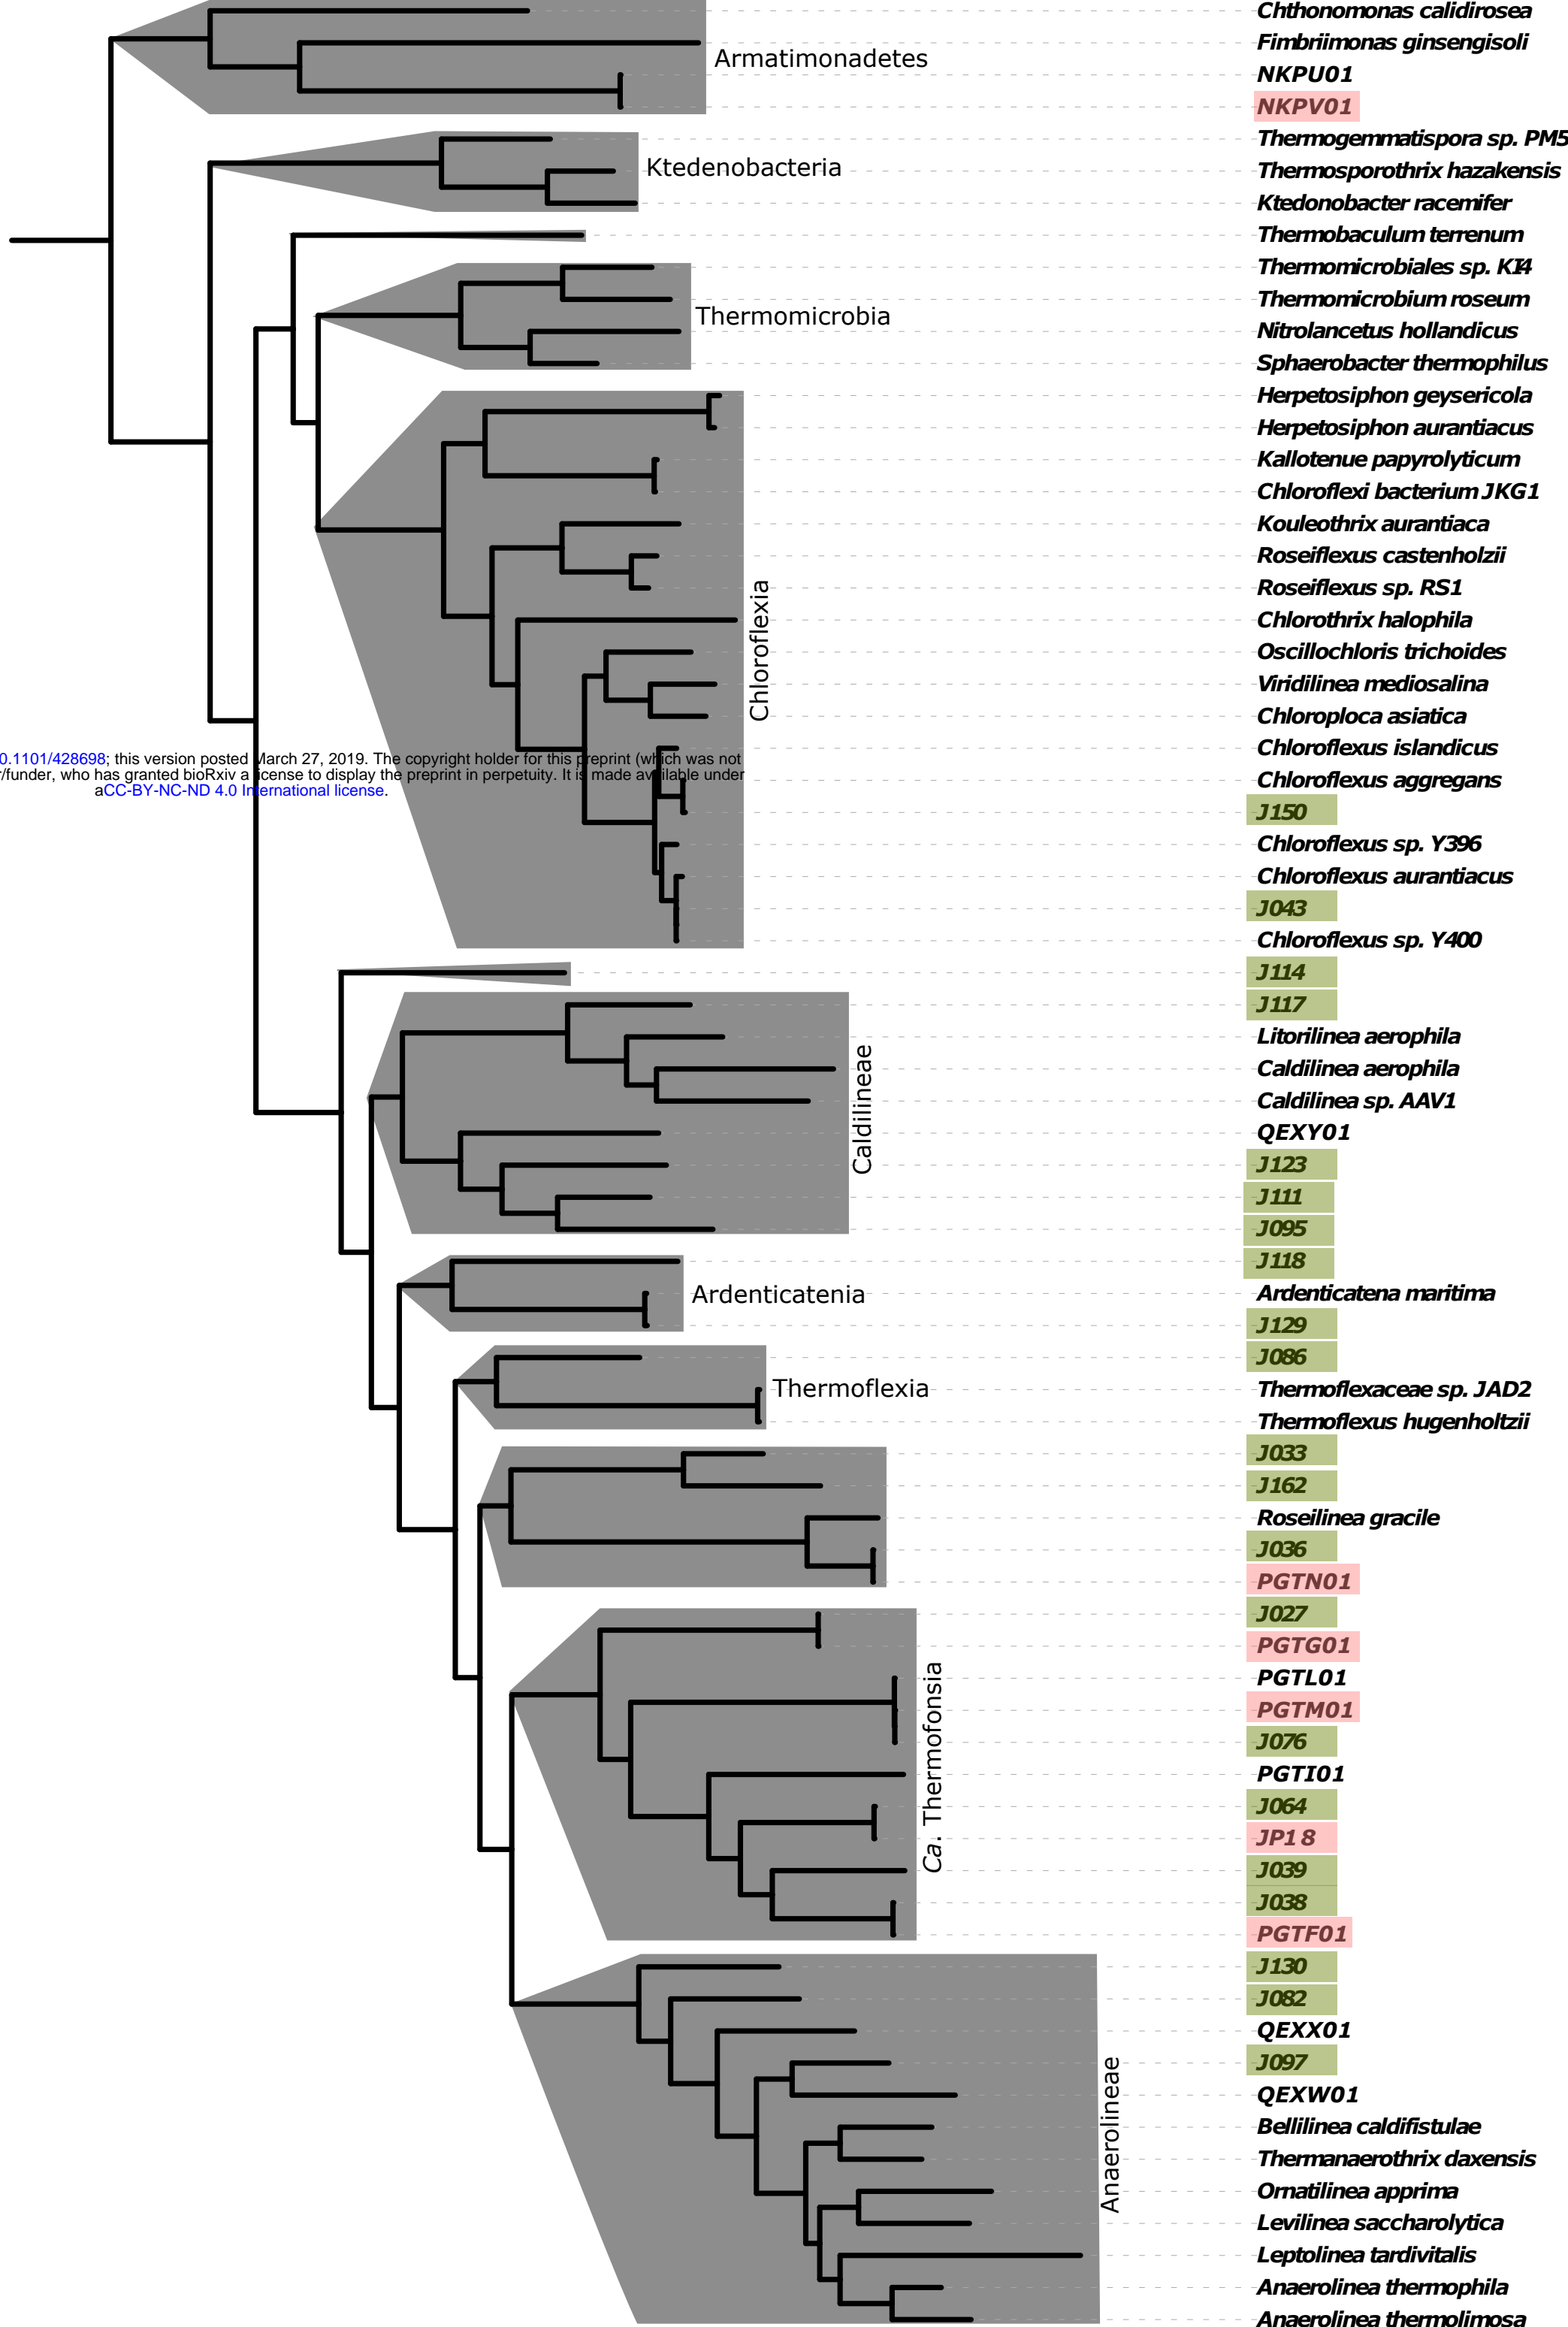

bioRxiv preprint doi: <https://doi.org/10.1101/428698>; this version posted March 27, 2019. The copyright holder for this preprint (which was not certified by peer review) is the author/funder, who has granted bioRxiv a license to display the preprint in perpetuity. It is made available under aCC-BY-NC-ND 4.0 International license.

Tree scale: 0.1
